# Supplementary material
Source: ML conference proceedings conference paper supplement (https://openreview.net/forum?id=LGmO9VvuP5)

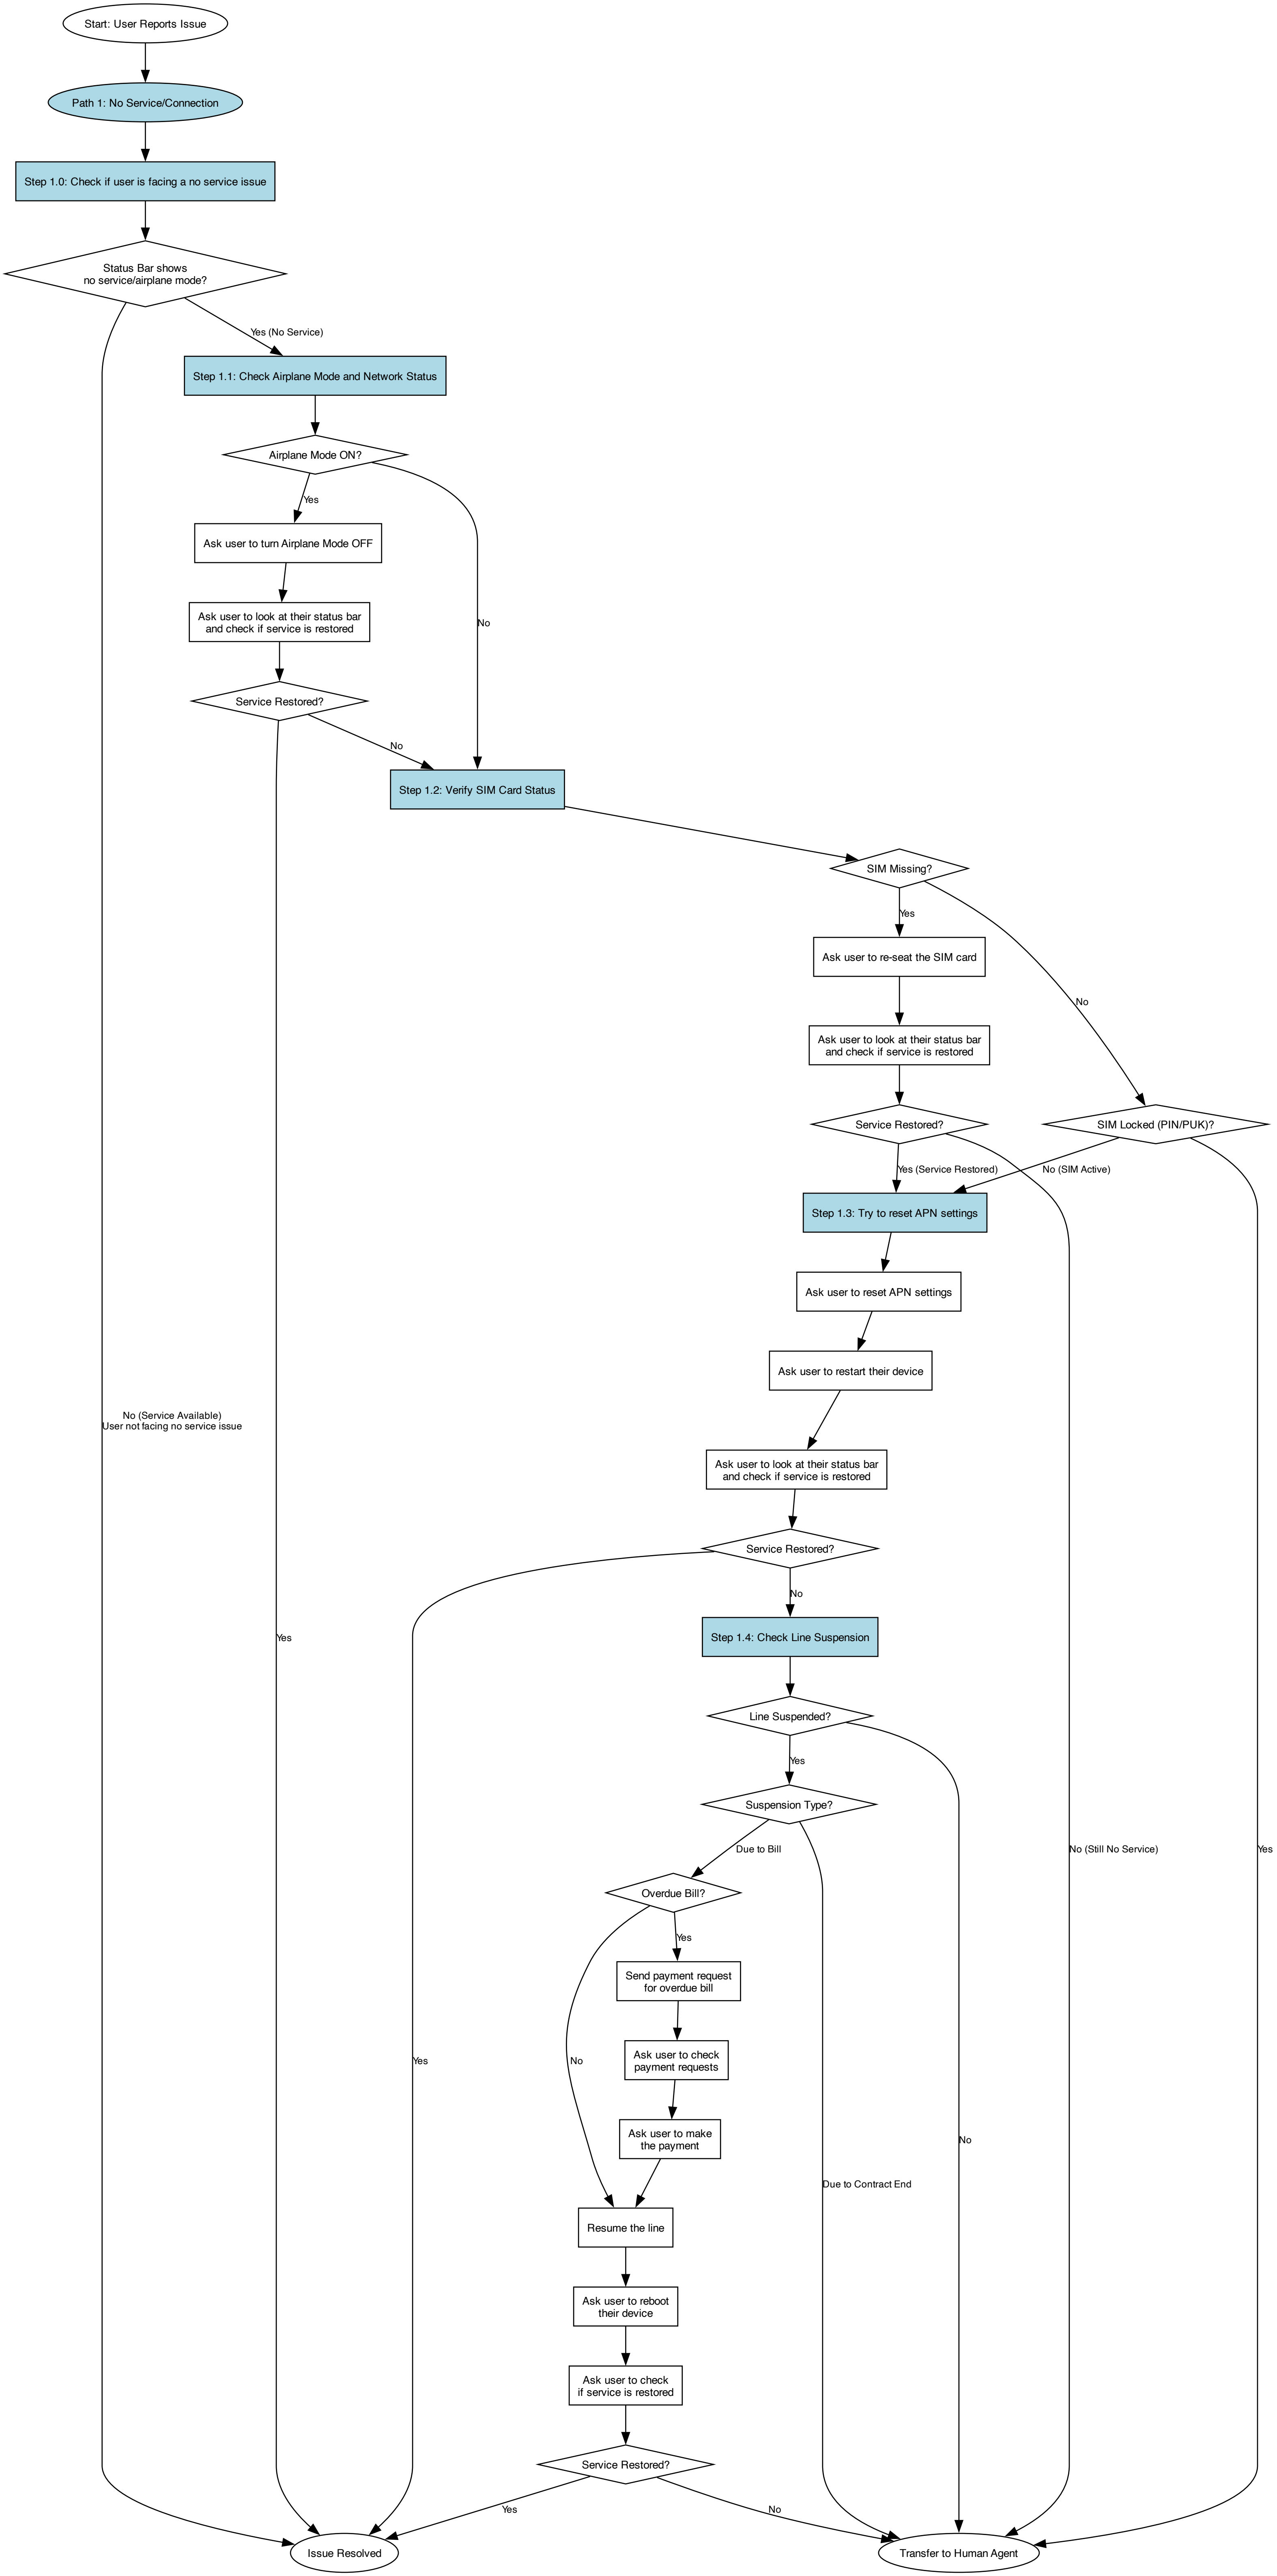

Supplement: supplementary_material [file tech_support_path1_no_service.pdf › tau2-bench/data/tau2/domains/telecom/workflows/tech_support_path1_no_service.pdf]

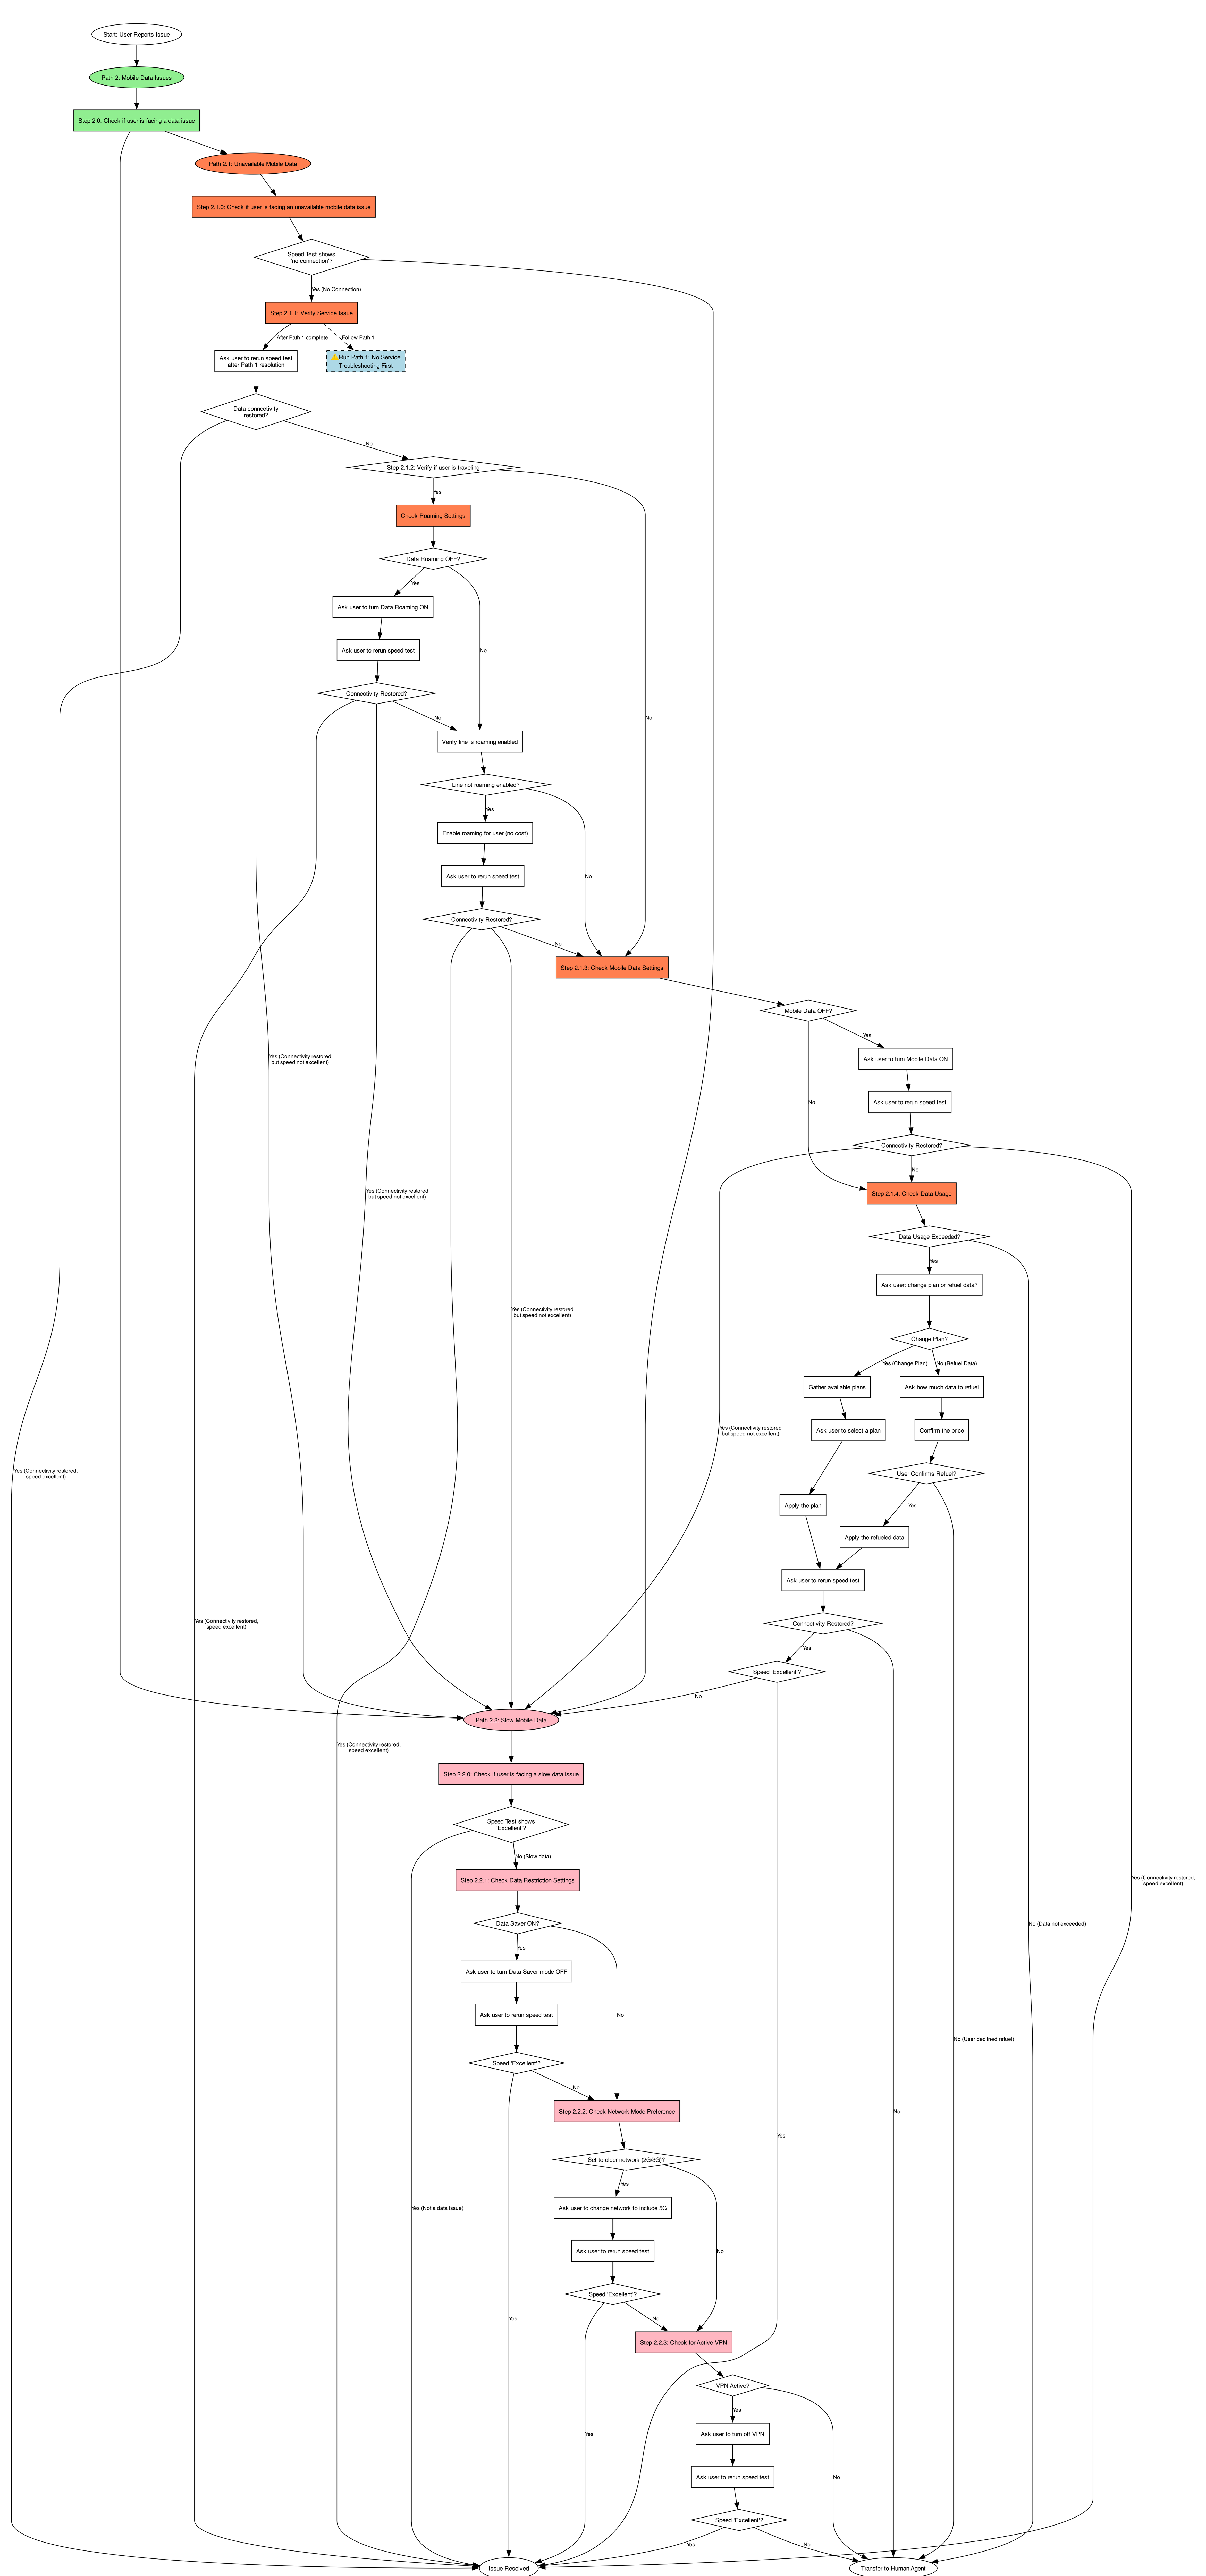

Supplement: supplementary_material [file tech_support_path2_mobile_data.pdf › tau2-bench/data/tau2/domains/telecom/workflows/tech_support_path2_mobile_data.pdf]

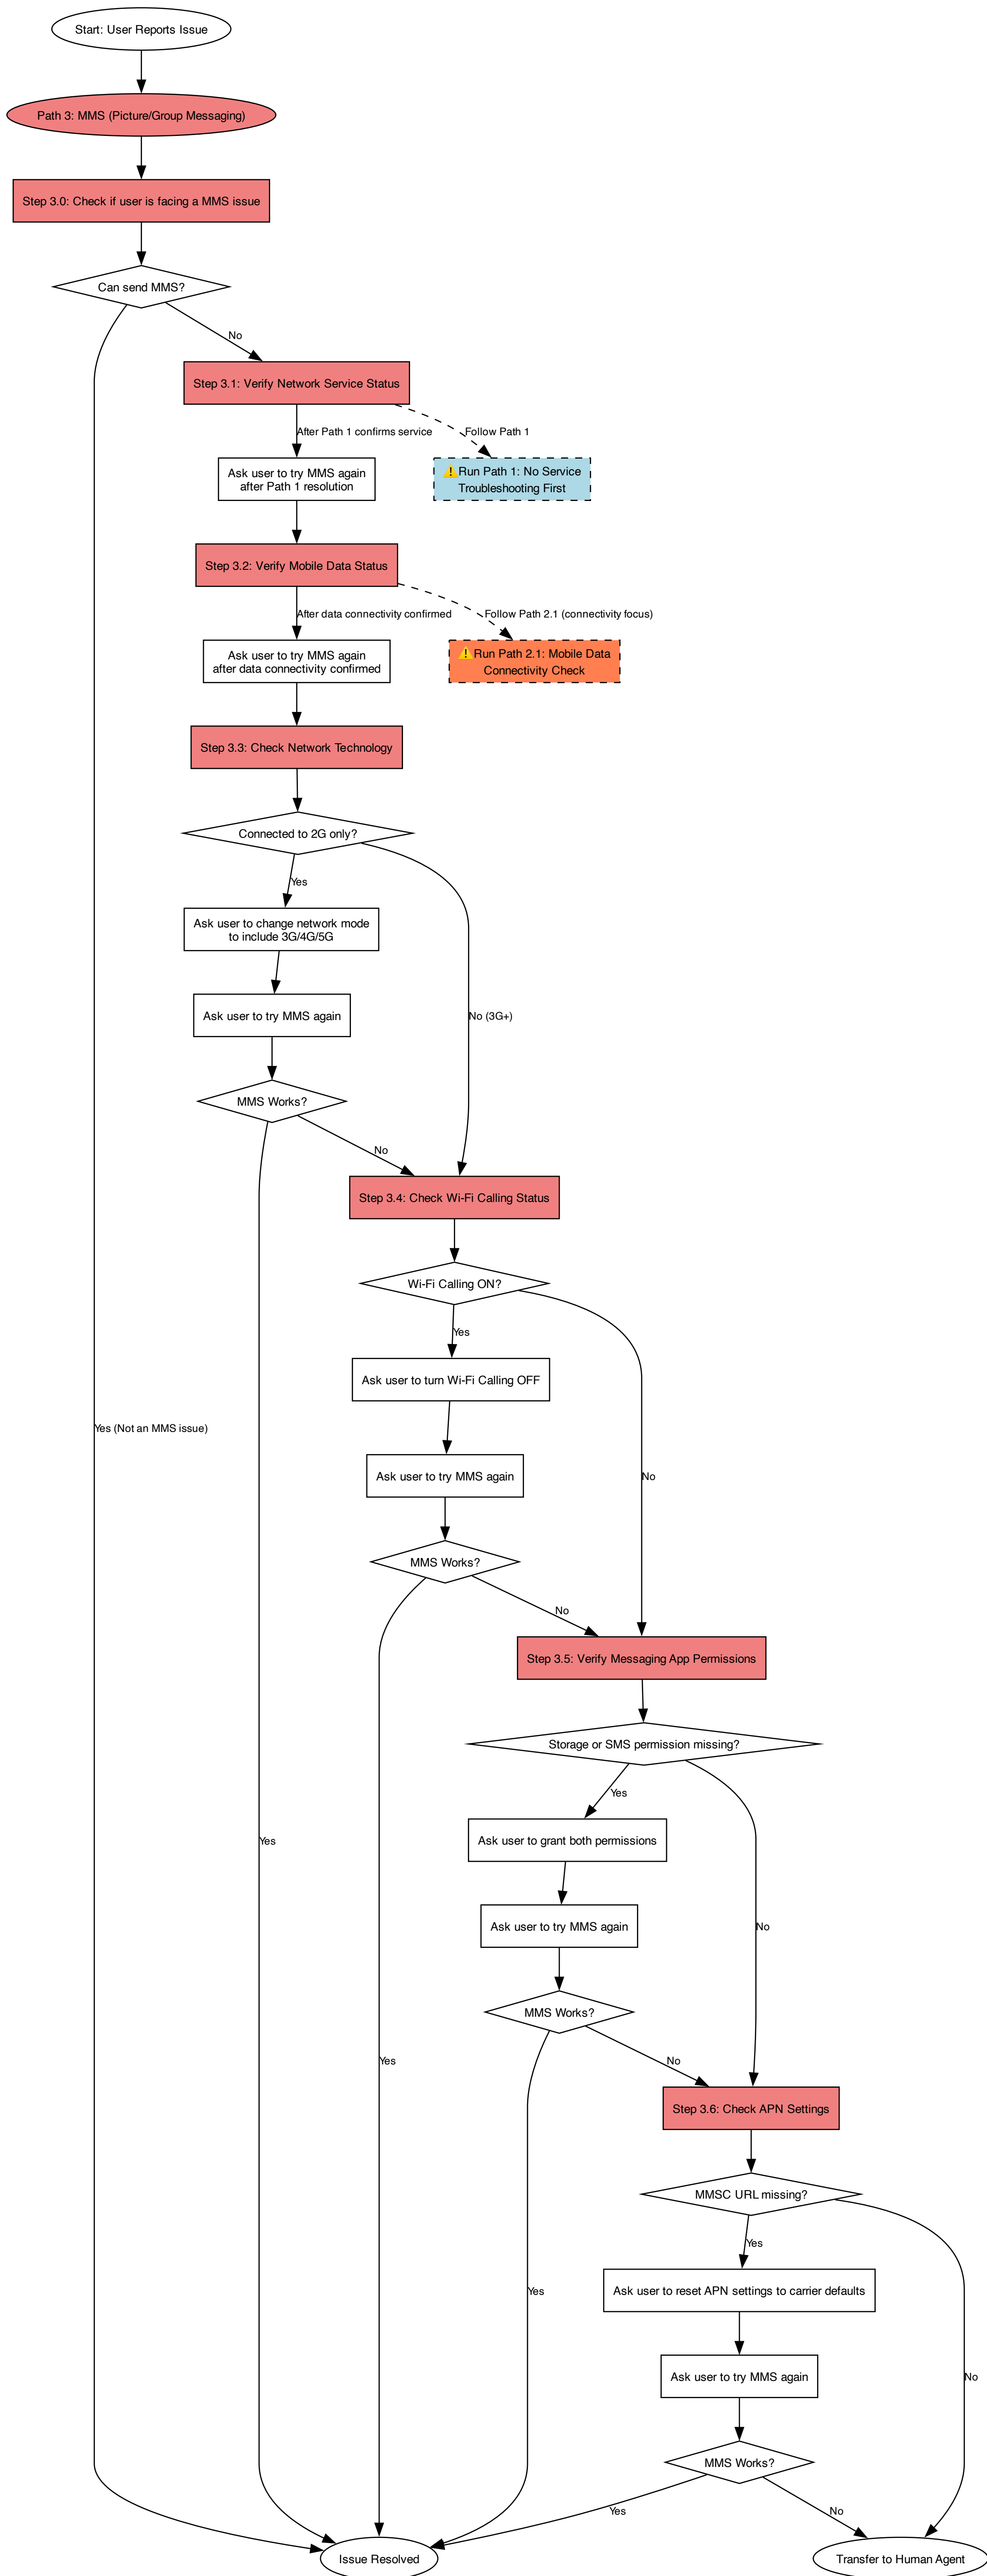

Supplement: supplementary_material [file tech_support_path3_mms.pdf › tau2-bench/data/tau2/domains/telecom/workflows/tech_support_path3_mms.pdf]

# claude-3.7-sonnet

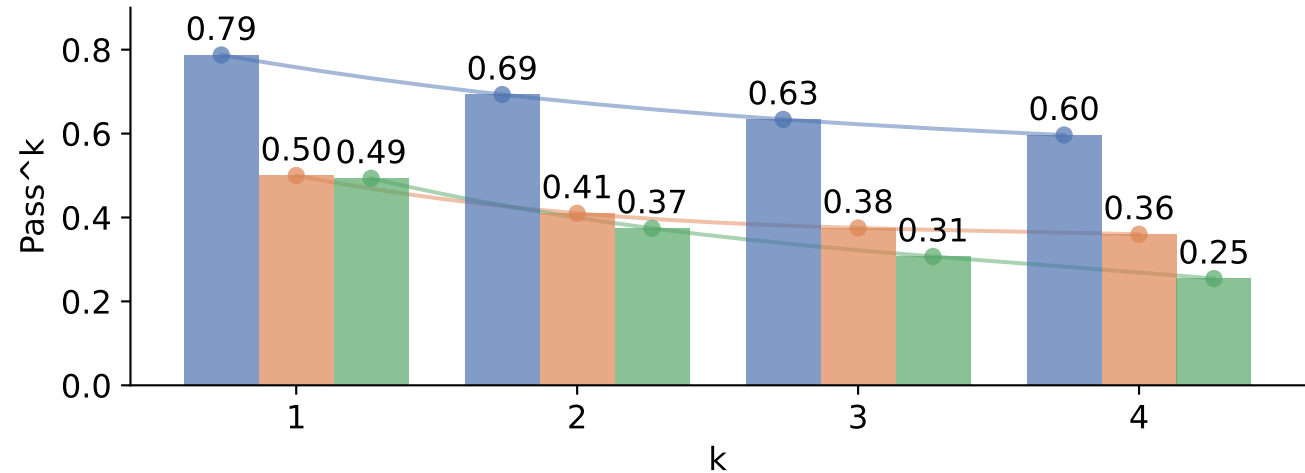

Supplement: supplementary_material [file pass_k_metrics_default_all_domains_claude-3-7-sonnet-20250219.pdf › tau2-bench/data/tau2/results/final/figs/pass_k_metrics_default_all_domains_claude-3-7-sonnet-20250219.pdf]

# gpt4.1

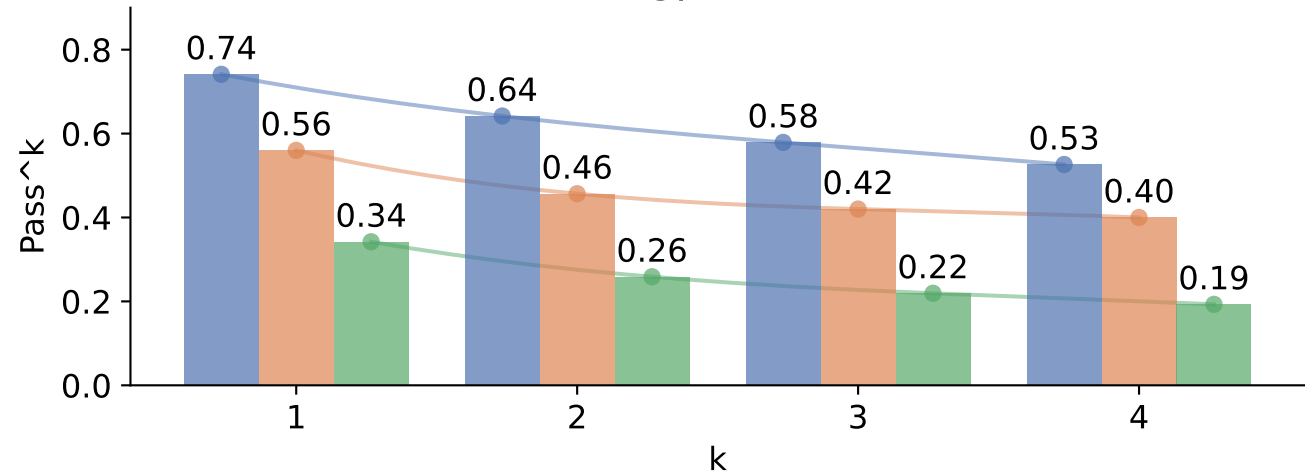

Supplement: supplementary_material [file pass_k_metrics_default_all_domains_gpt-4.1-2025-04-14.pdf › tau2-bench/data/tau2/results/final/figs/pass_k_metrics_default_all_domains_gpt-4.1-2025-04-14.pdf]

gpt4.1-mini

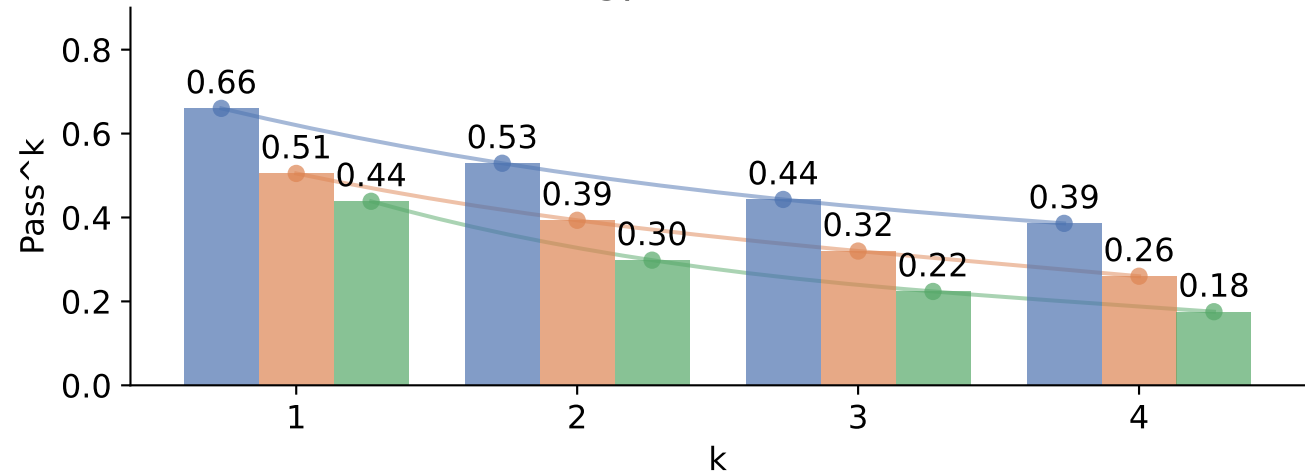

Supplement: supplementary_material [file pass_k_metrics_default_all_domains_gpt-4.1-mini-2025-04-14.pdf › tau2-bench/data/tau2/results/final/figs/pass_k_metrics_default_all_domains_gpt-4.1-mini-2025-04-14.pdf]

# o4-mini

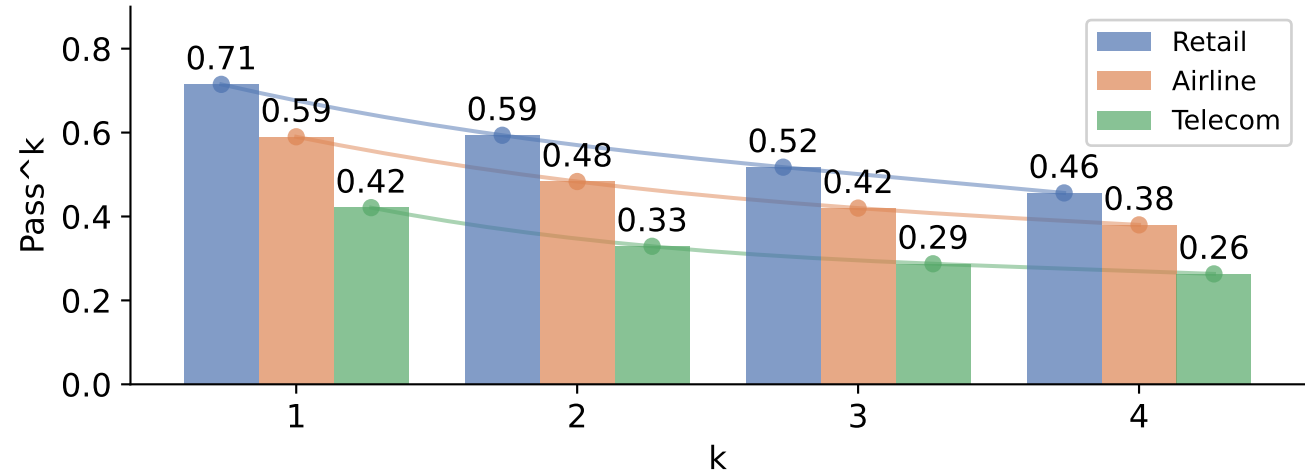

Supplement: supplementary_material [file pass_k_metrics_default_all_domains_o4-mini-2025-04-16.pdf › tau2-bench/data/tau2/results/final/figs/pass_k_metrics_default_all_domains_o4-mini-2025-04-16.pdf]

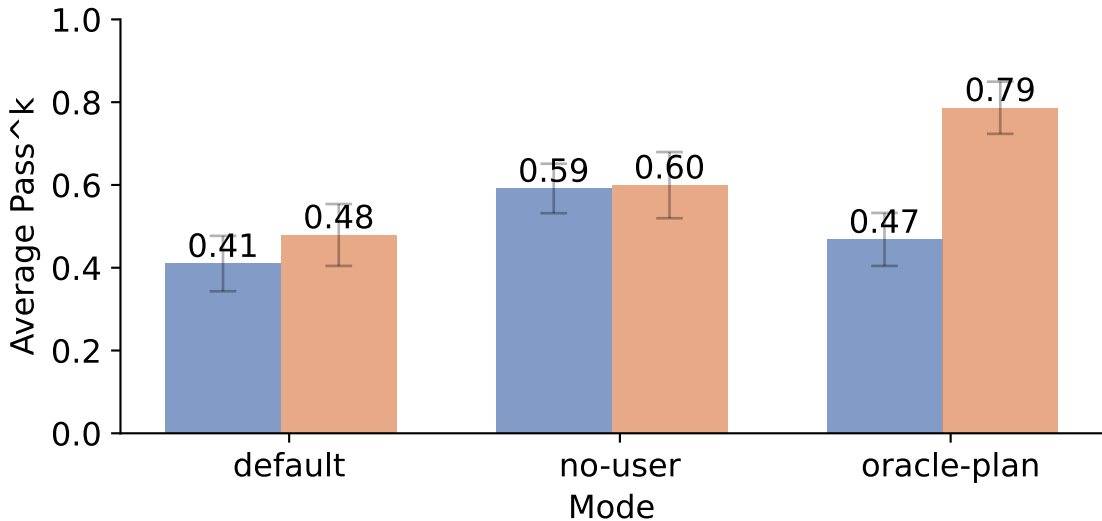

Supplement: supplementary_material [file pass_k_metrics_telecom-workflow_avg_bar.pdf › tau2-bench/data/tau2/results/final/figs/pass_k_metrics_telecom-workflow_avg_bar.pdf]

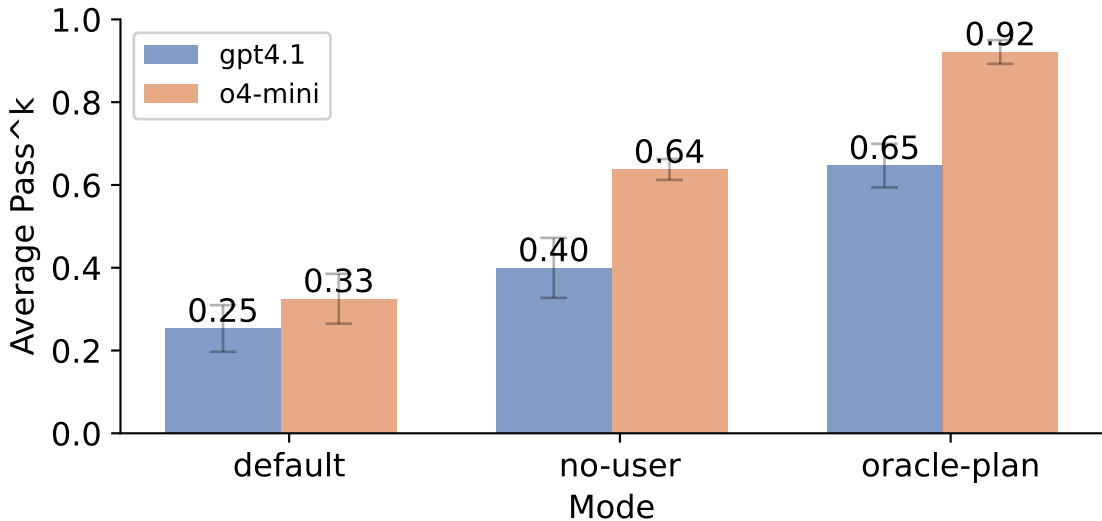

Supplement: supplementary_material [file pass_k_metrics_telecom_avg_bar.pdf › tau2-bench/data/tau2/results/final/figs/pass_k_metrics_telecom_avg_bar.pdf]

gpt4.1

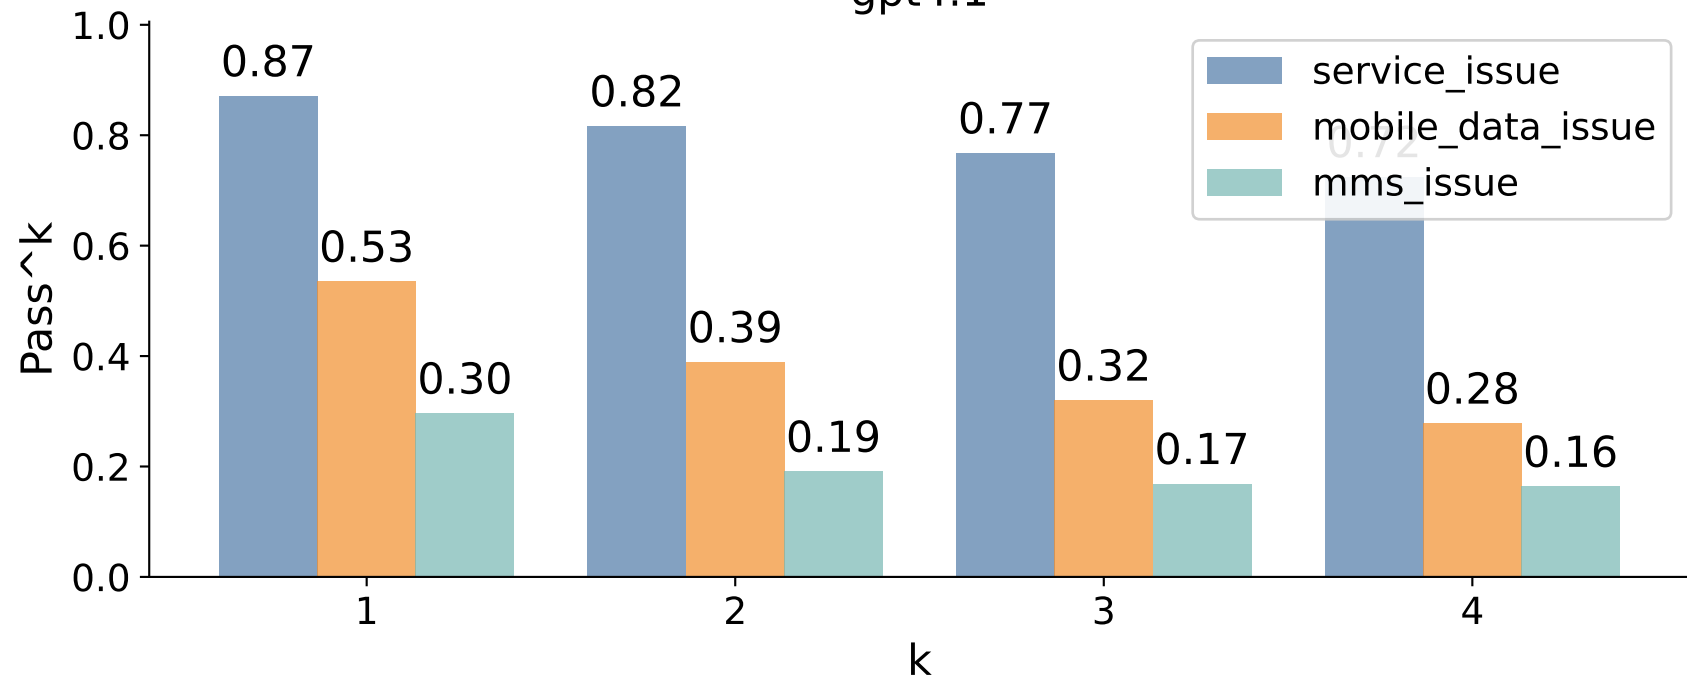

Supplement: supplementary_material [file pass_k_vs_k_per_intent_telecom-workflow_gpt-4.1-2025-04-14.pdf › tau2-bench/data/tau2/results/final/figs/pass_k_vs_k_per_intent_telecom-workflow_gpt-4.1-2025-04-14.pdf]

o4-mini

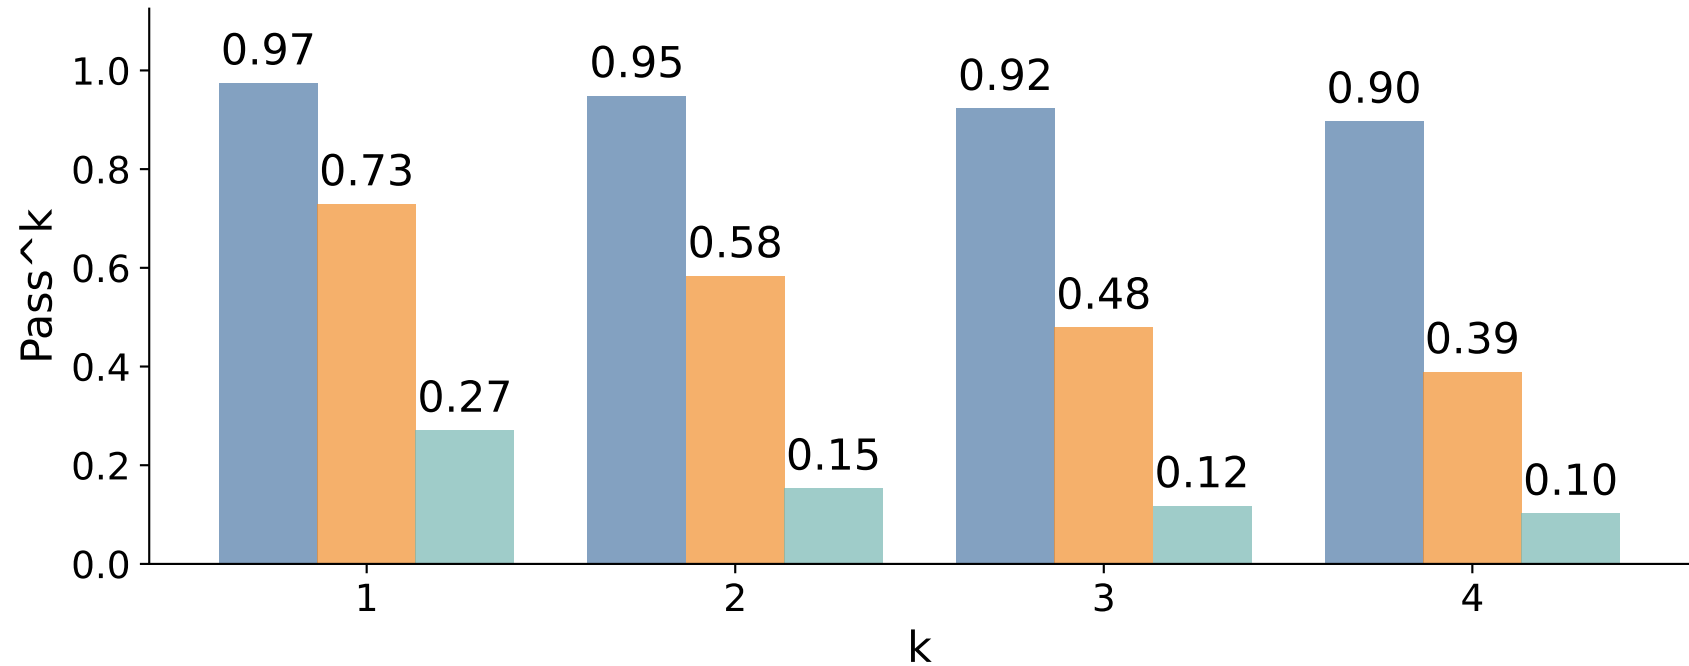

Supplement: supplementary_material [file pass_k_vs_k_per_intent_telecom-workflow_o4-mini-2025-04-16.pdf › tau2-bench/data/tau2/results/final/figs/pass_k_vs_k_per_intent_telecom-workflow_o4-mini-2025-04-16.pdf]

claude-3.7-sonnet

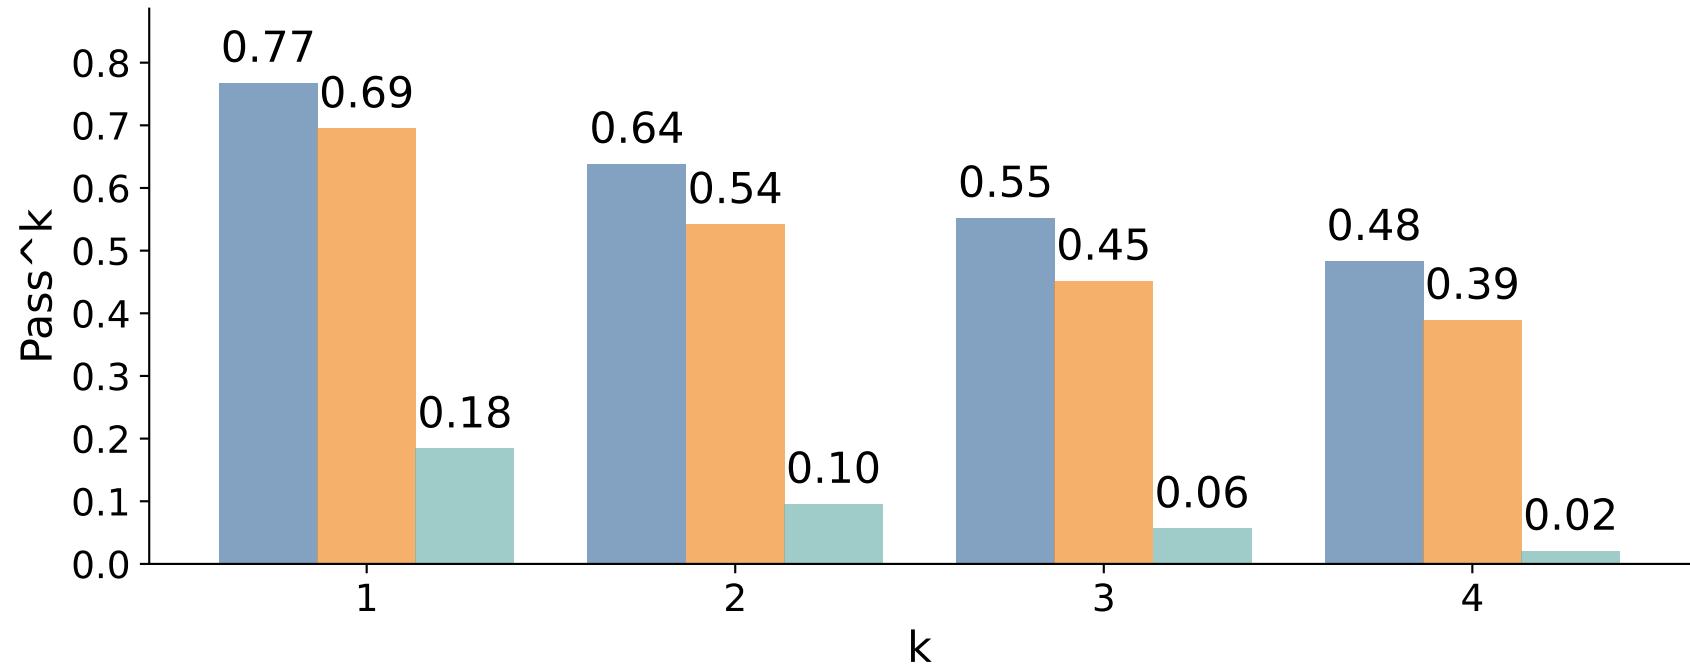

Supplement: supplementary_material [file pass_k_vs_k_per_intent_telecom_claude-3-7-sonnet-20250219.pdf › tau2-bench/data/tau2/results/final/figs/pass_k_vs_k_per_intent_telecom_claude-3-7-sonnet-20250219.pdf]

gpt4.1

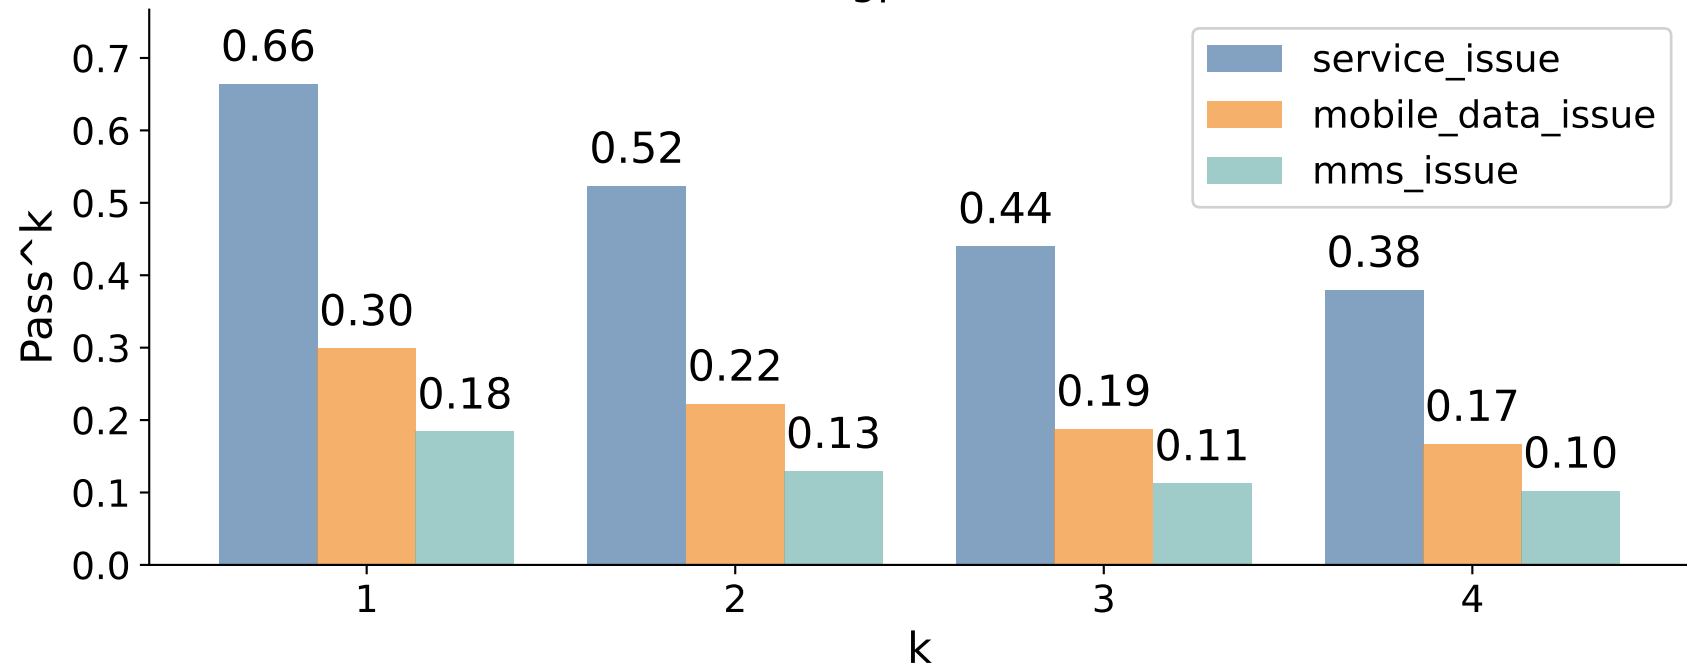

Supplement: supplementary_material [file pass_k_vs_k_per_intent_telecom_gpt-4.1-2025-04-14.pdf › tau2-bench/data/tau2/results/final/figs/pass_k_vs_k_per_intent_telecom_gpt-4.1-2025-04-14.pdf]

gpt4.1-mini

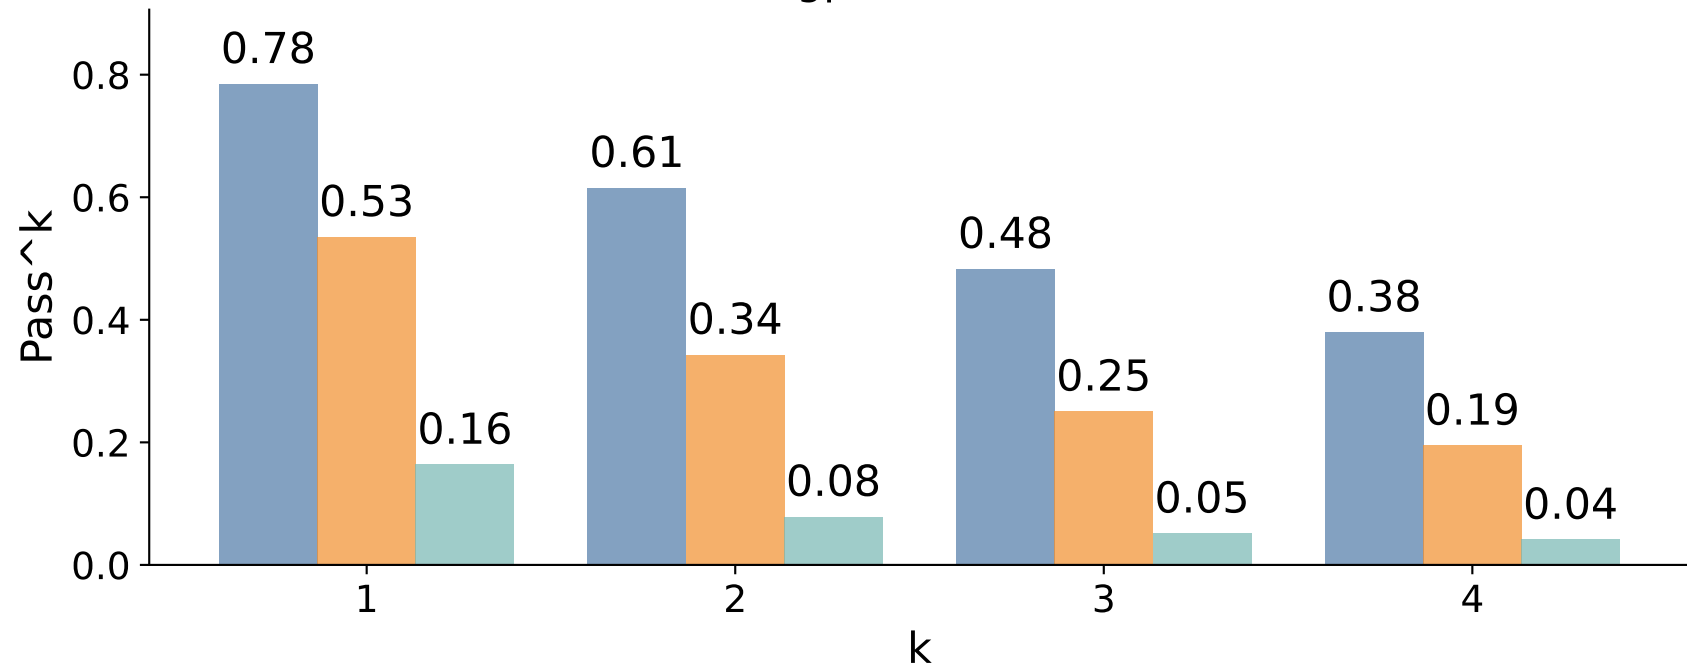

Supplement: supplementary_material [file pass_k_vs_k_per_intent_telecom_gpt-4.1-mini-2025-04-14.pdf › tau2-bench/data/tau2/results/final/figs/pass_k_vs_k_per_intent_telecom_gpt-4.1-mini-2025-04-14.pdf]

o4-mini

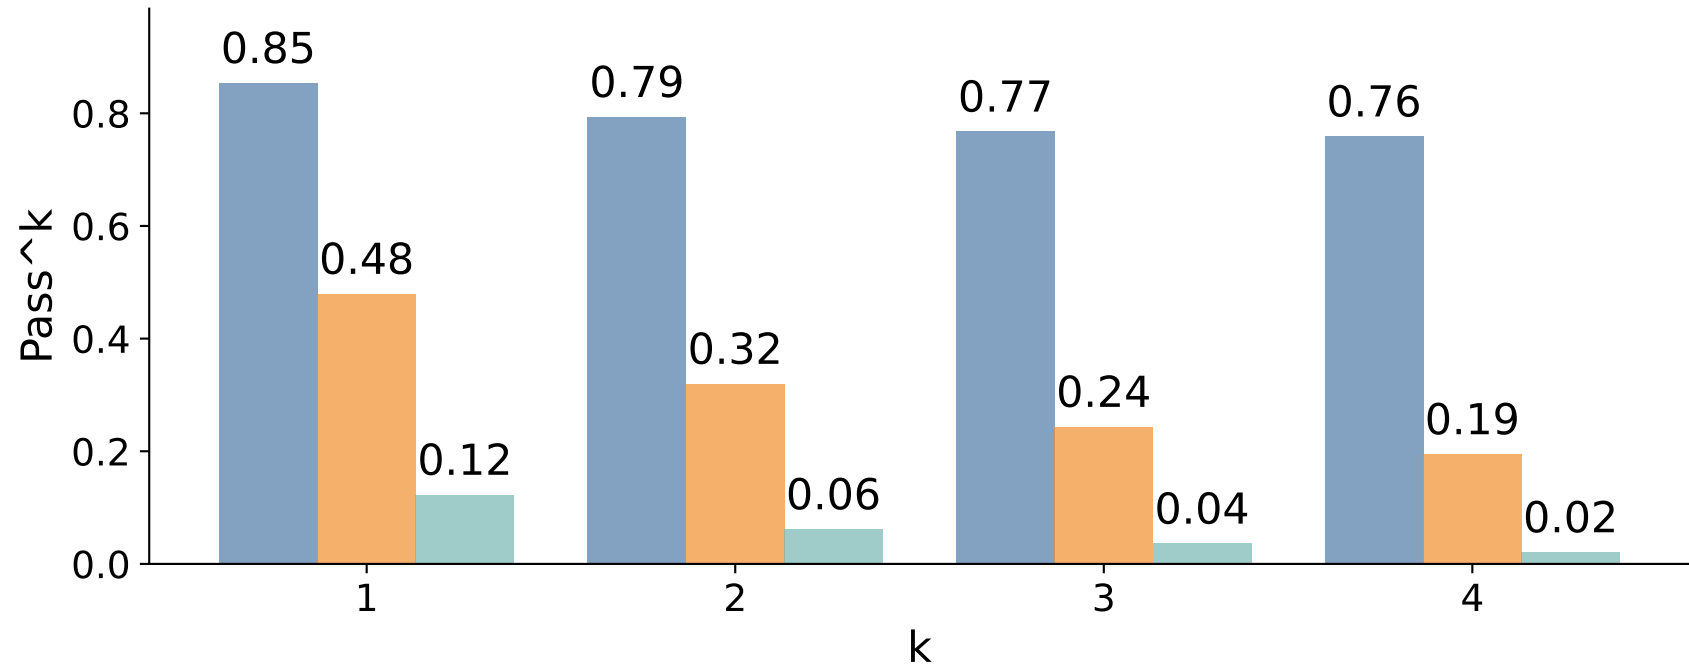

Supplement: supplementary_material [file pass_k_vs_k_per_intent_telecom_o4-mini-2025-04-16.pdf › tau2-bench/data/tau2/results/final/figs/pass_k_vs_k_per_intent_telecom_o4-mini-2025-04-16.pdf]

gpt4.1

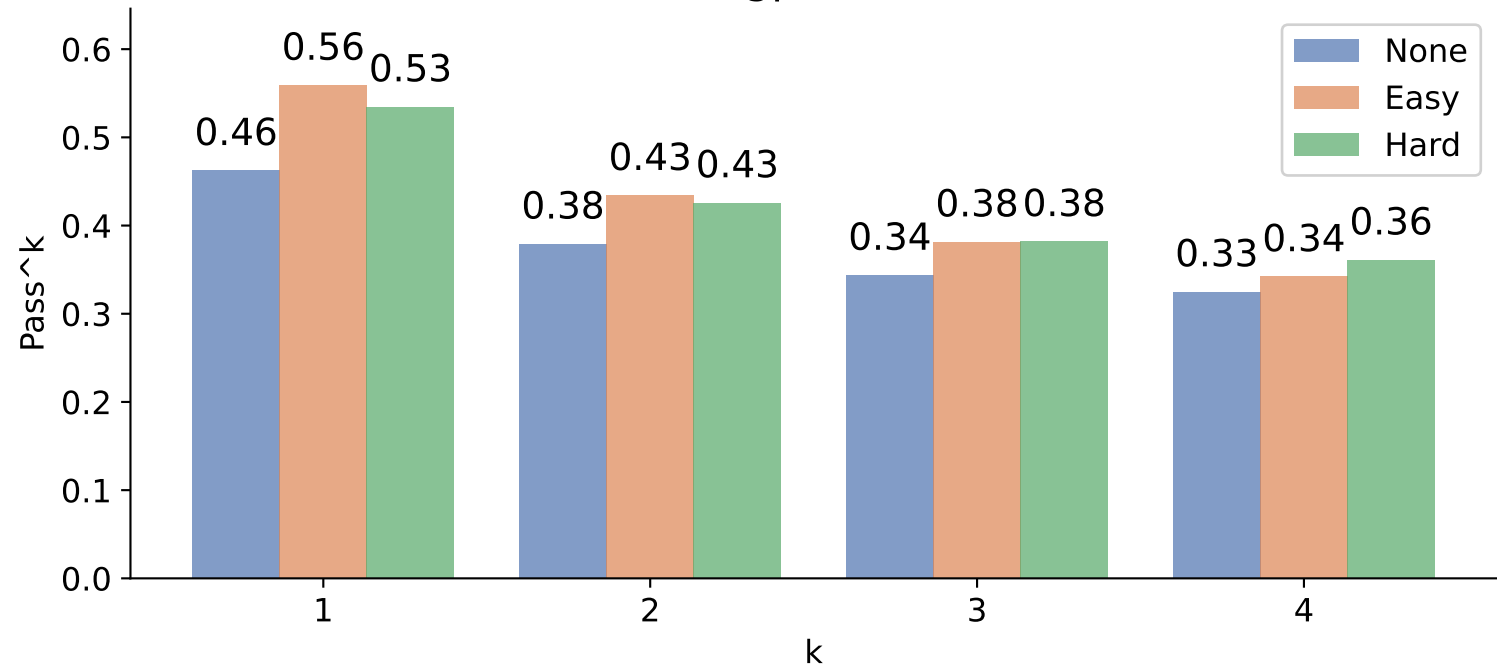

Supplement: supplementary_material [file pass_k_vs_k_per_persona_telecom-workflow_gpt-4.1-2025-04-14.pdf › tau2-bench/data/tau2/results/final/figs/pass_k_vs_k_per_persona_telecom-workflow_gpt-4.1-2025-04-14.pdf]

o4-mini

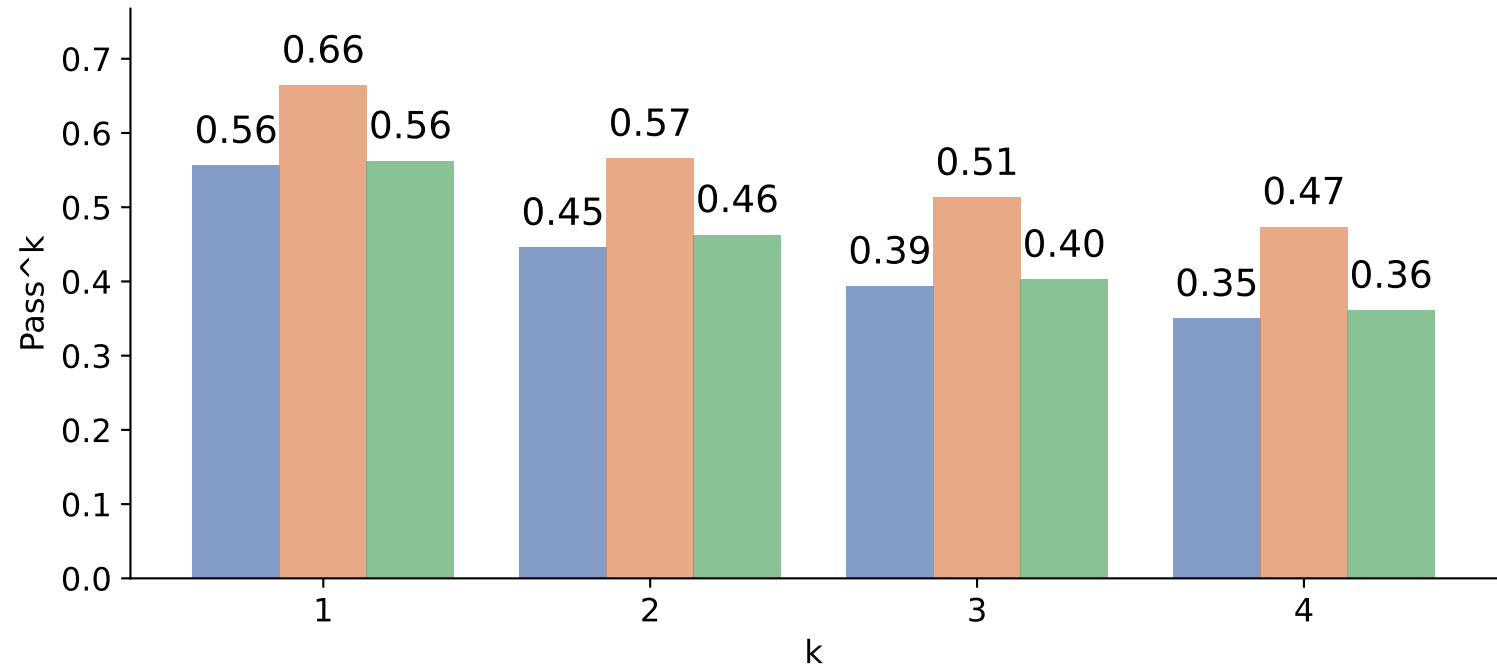

Supplement: supplementary_material [file pass_k_vs_k_per_persona_telecom-workflow_o4-mini-2025-04-16.pdf › tau2-bench/data/tau2/results/final/figs/pass_k_vs_k_per_persona_telecom-workflow_o4-mini-2025-04-16.pdf]

claude-3.7-sonnet

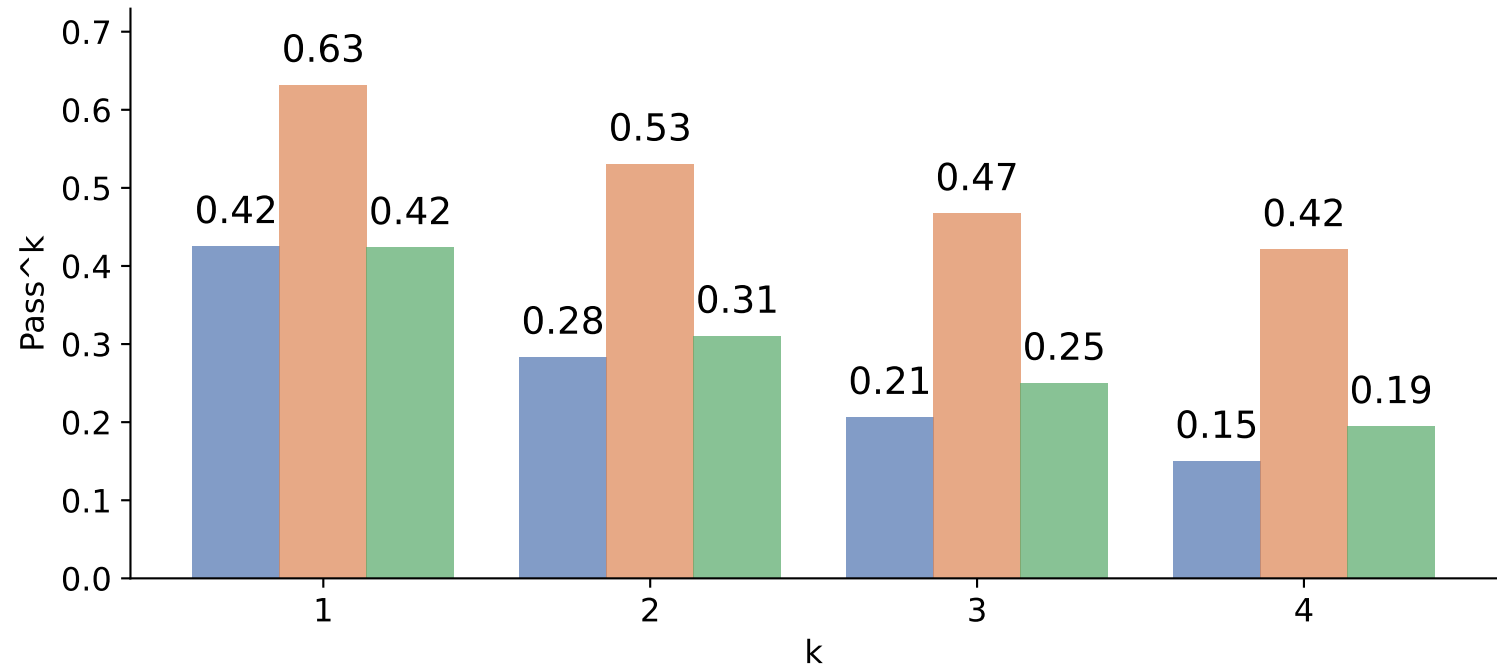

Supplement: supplementary_material [file pass_k_vs_k_per_persona_telecom_claude-3-7-sonnet-20250219.pdf › tau2-bench/data/tau2/results/final/figs/pass_k_vs_k_per_persona_telecom_claude-3-7-sonnet-20250219.pdf]

gpt4.1

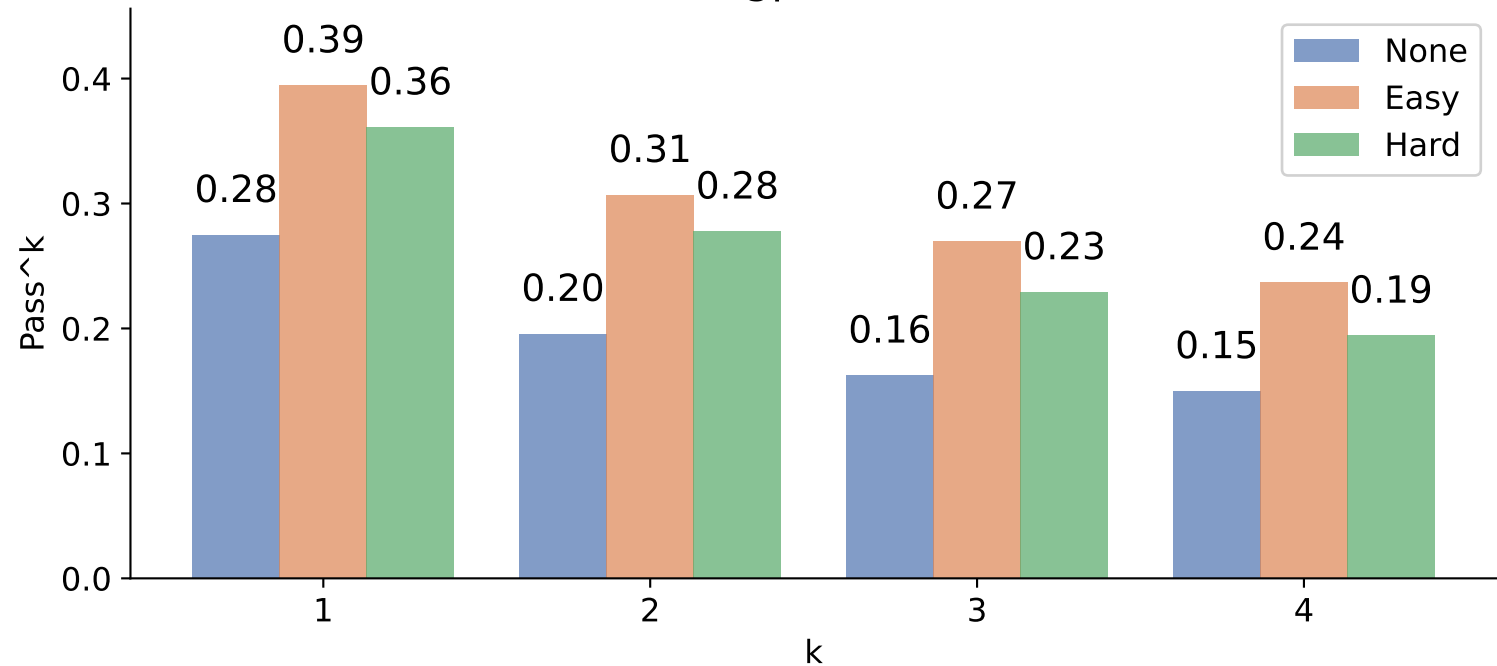

Supplement: supplementary_material [file pass_k_vs_k_per_persona_telecom_gpt-4.1-2025-04-14.pdf › tau2-bench/data/tau2/results/final/figs/pass_k_vs_k_per_persona_telecom_gpt-4.1-2025-04-14.pdf]

gpt4.1-mini

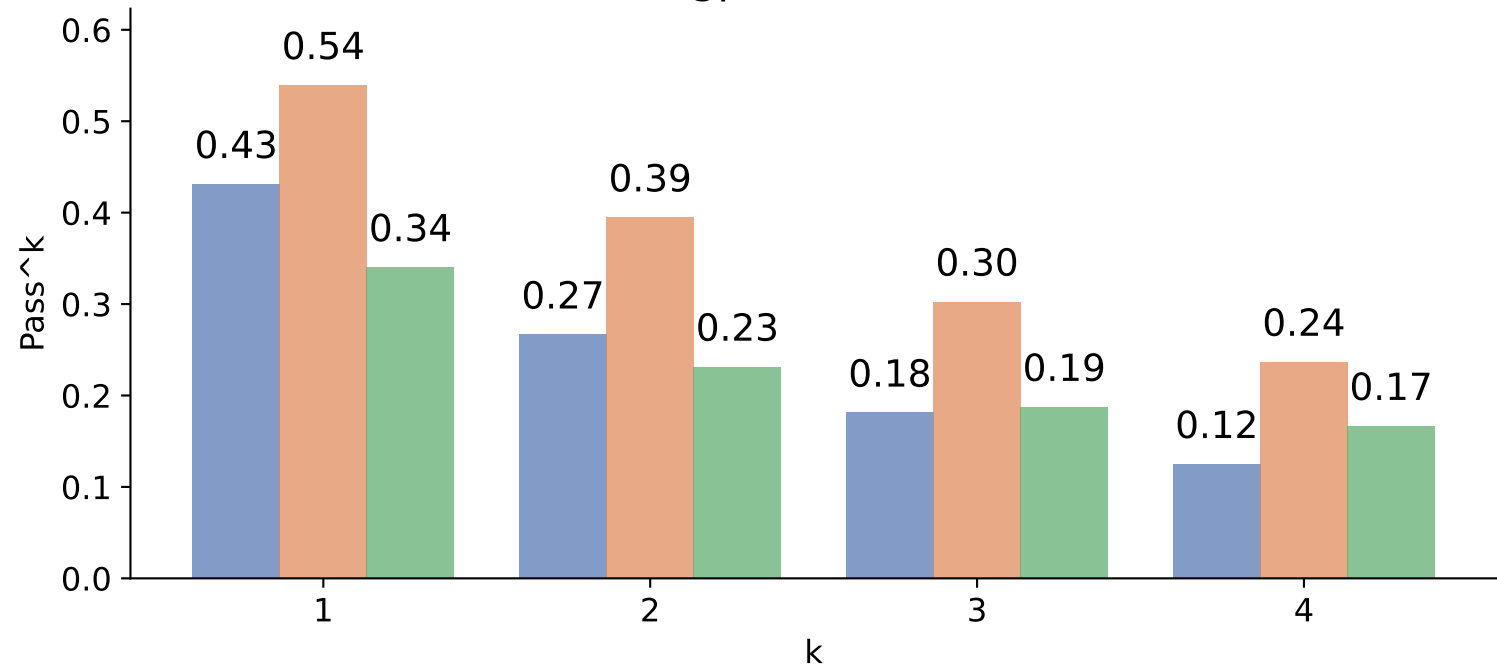

Supplement: supplementary_material [file pass_k_vs_k_per_persona_telecom_gpt-4.1-mini-2025-04-14.pdf › tau2-bench/data/tau2/results/final/figs/pass_k_vs_k_per_persona_telecom_gpt-4.1-mini-2025-04-14.pdf]

o4-mini

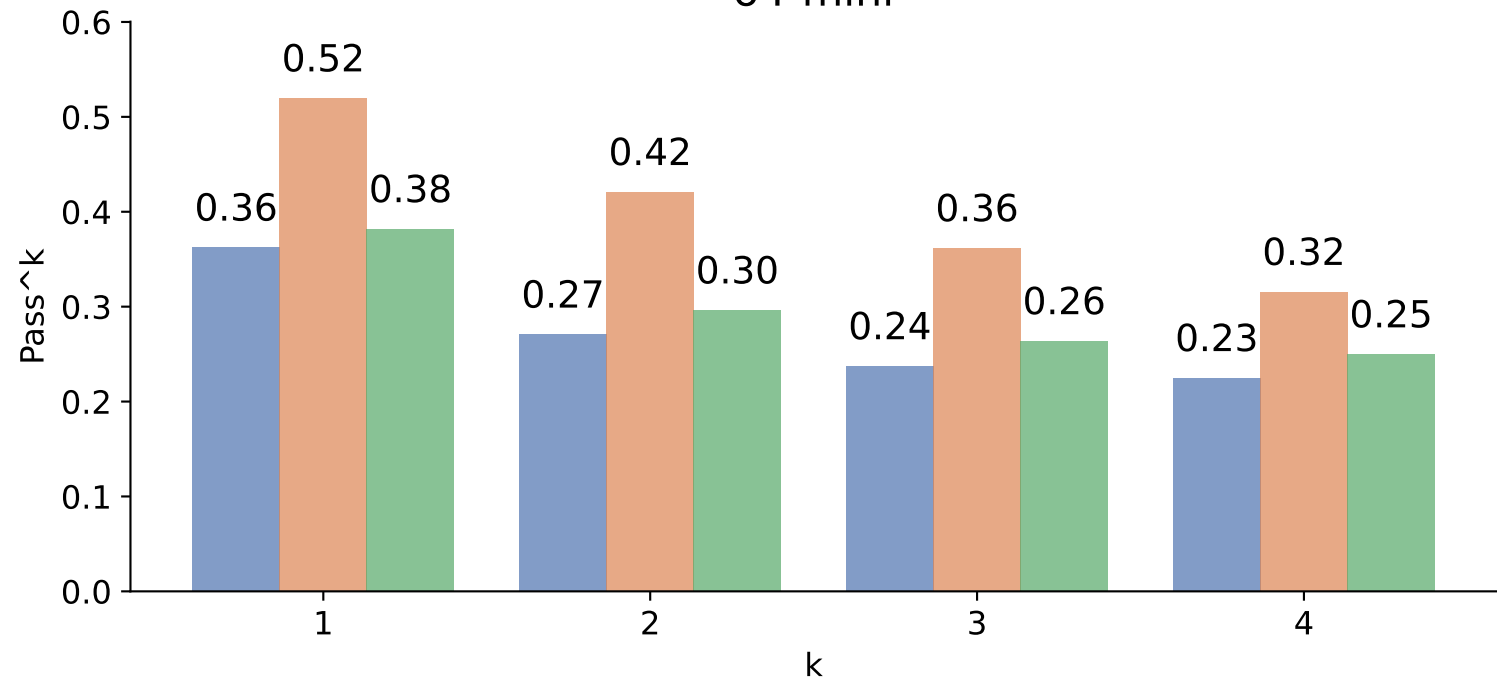

Supplement: supplementary_material [file pass_k_vs_k_per_persona_telecom_o4-mini-2025-04-16.pdf › tau2-bench/data/tau2/results/final/figs/pass_k_vs_k_per_persona_telecom_o4-mini-2025-04-16.pdf]

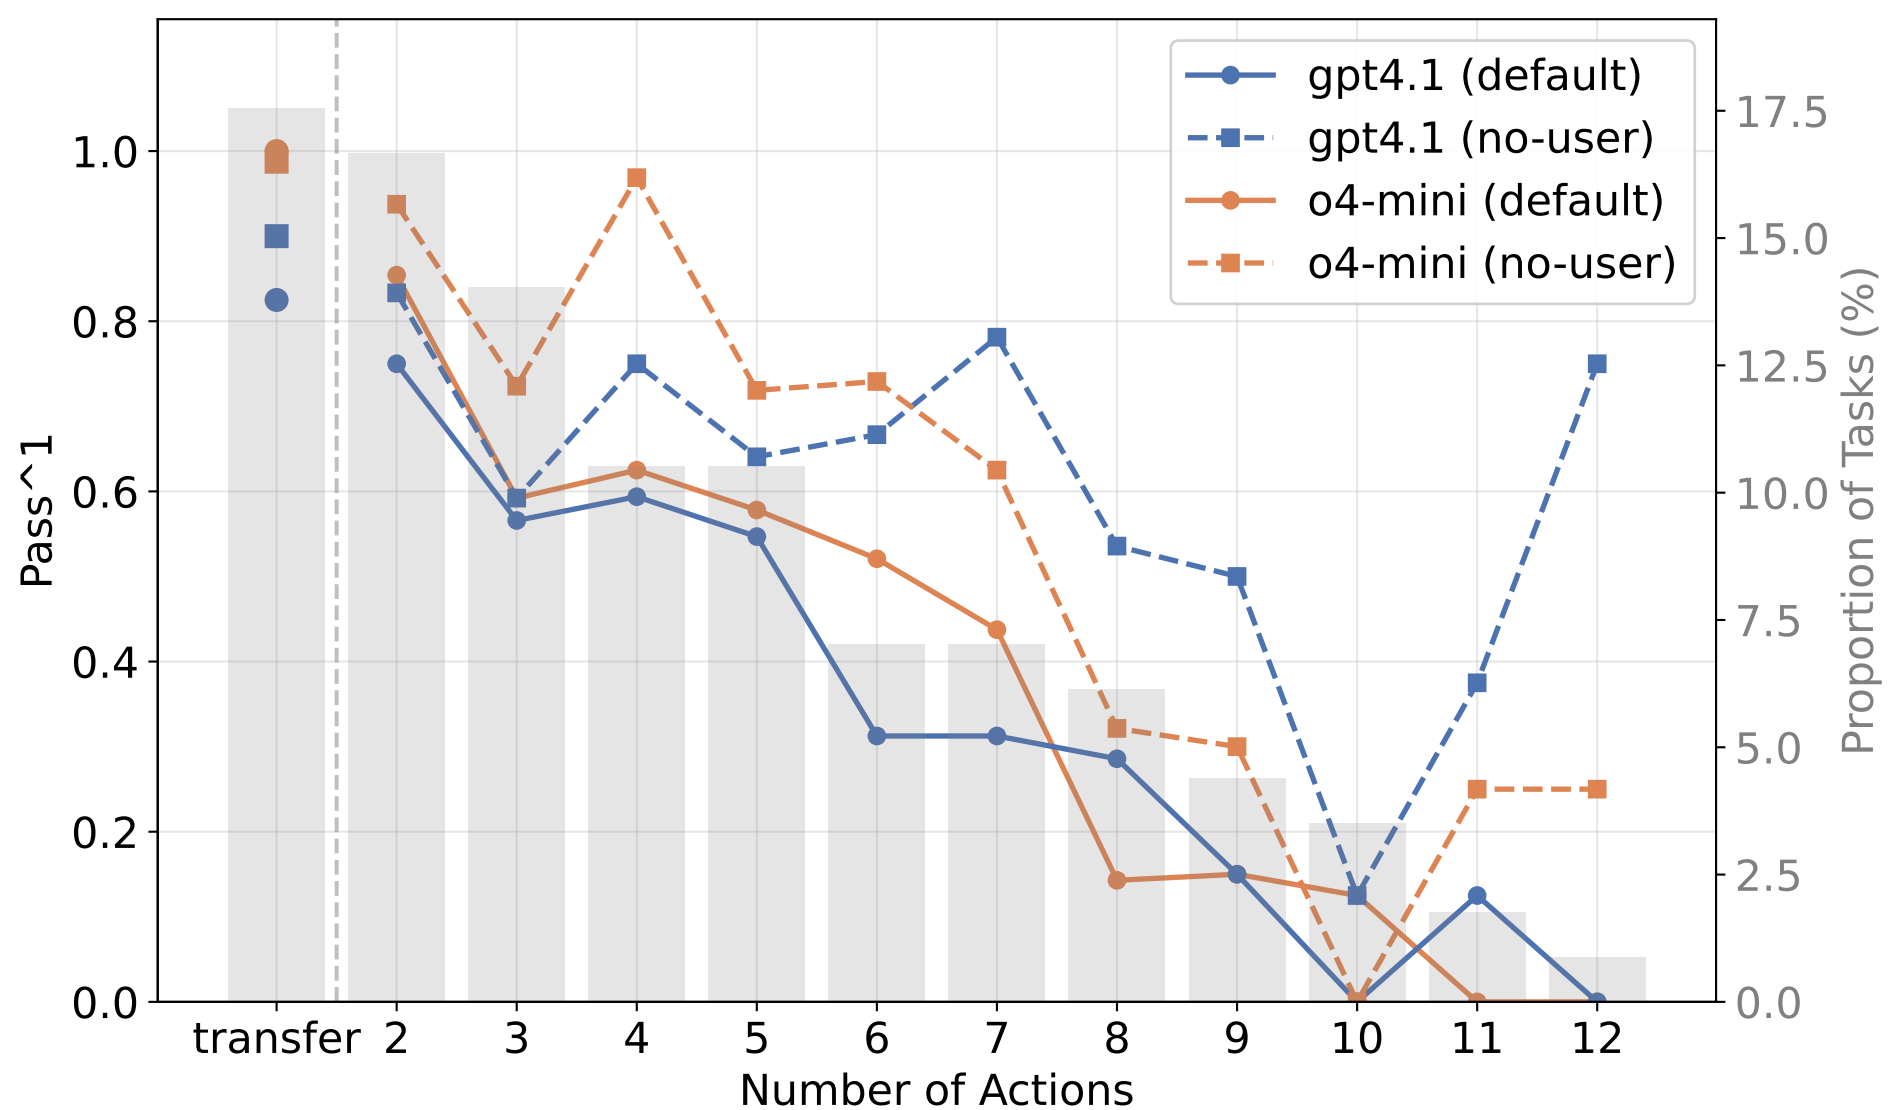

Supplement: supplementary_material [file pass_k_vs_num_actions_telecom-workflow_all_modes_llm_comparison.pdf › tau2-bench/data/tau2/results/final/figs/pass_k_vs_num_actions_telecom-workflow_all_modes_llm_comparison.pdf]

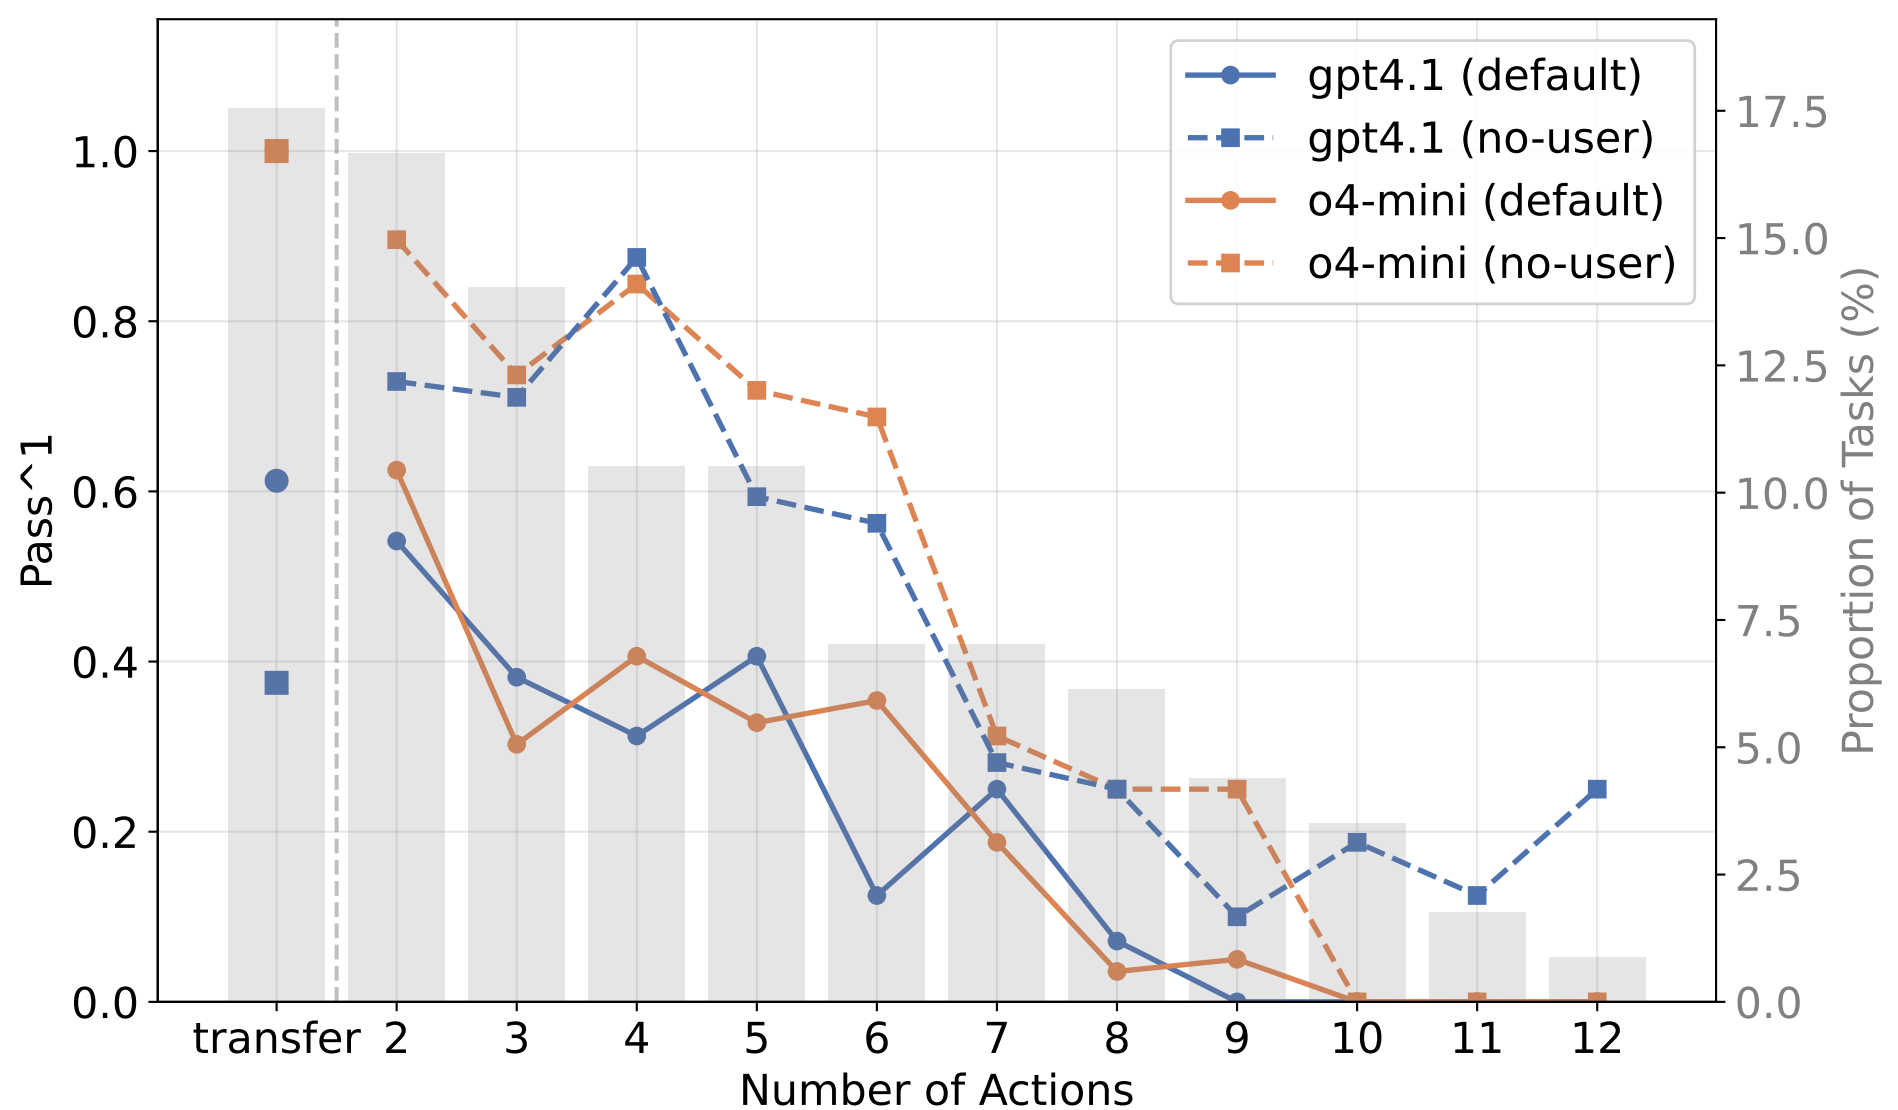

Supplement: supplementary_material [file pass_k_vs_num_actions_telecom_all_modes_llm_comparison.pdf › tau2-bench/data/tau2/results/final/figs/pass_k_vs_num_actions_telecom_all_modes_llm_comparison.pdf]

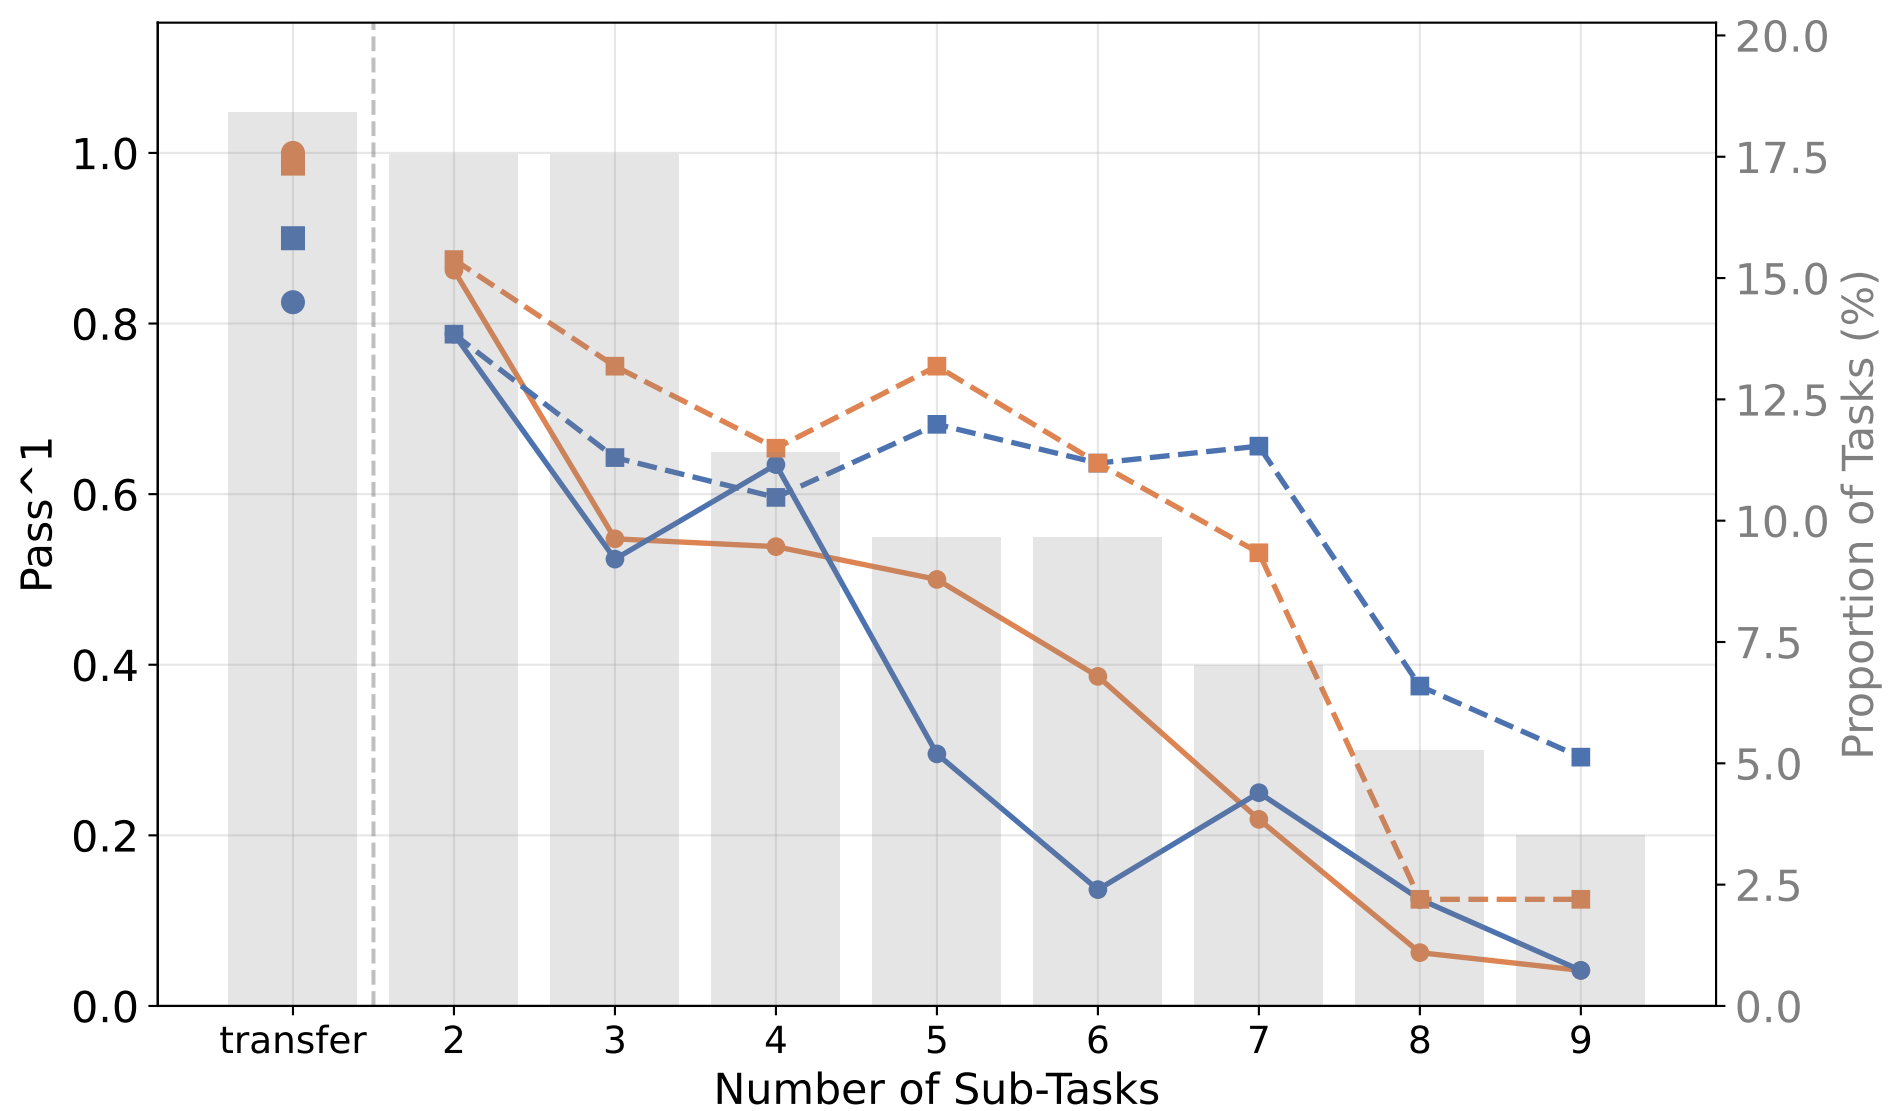

Supplement: supplementary_material [file pass_k_vs_num_issues_telecom-workflow_all_modes_llm_comparison.pdf › tau2-bench/data/tau2/results/final/figs/pass_k_vs_num_issues_telecom-workflow_all_modes_llm_comparison.pdf]

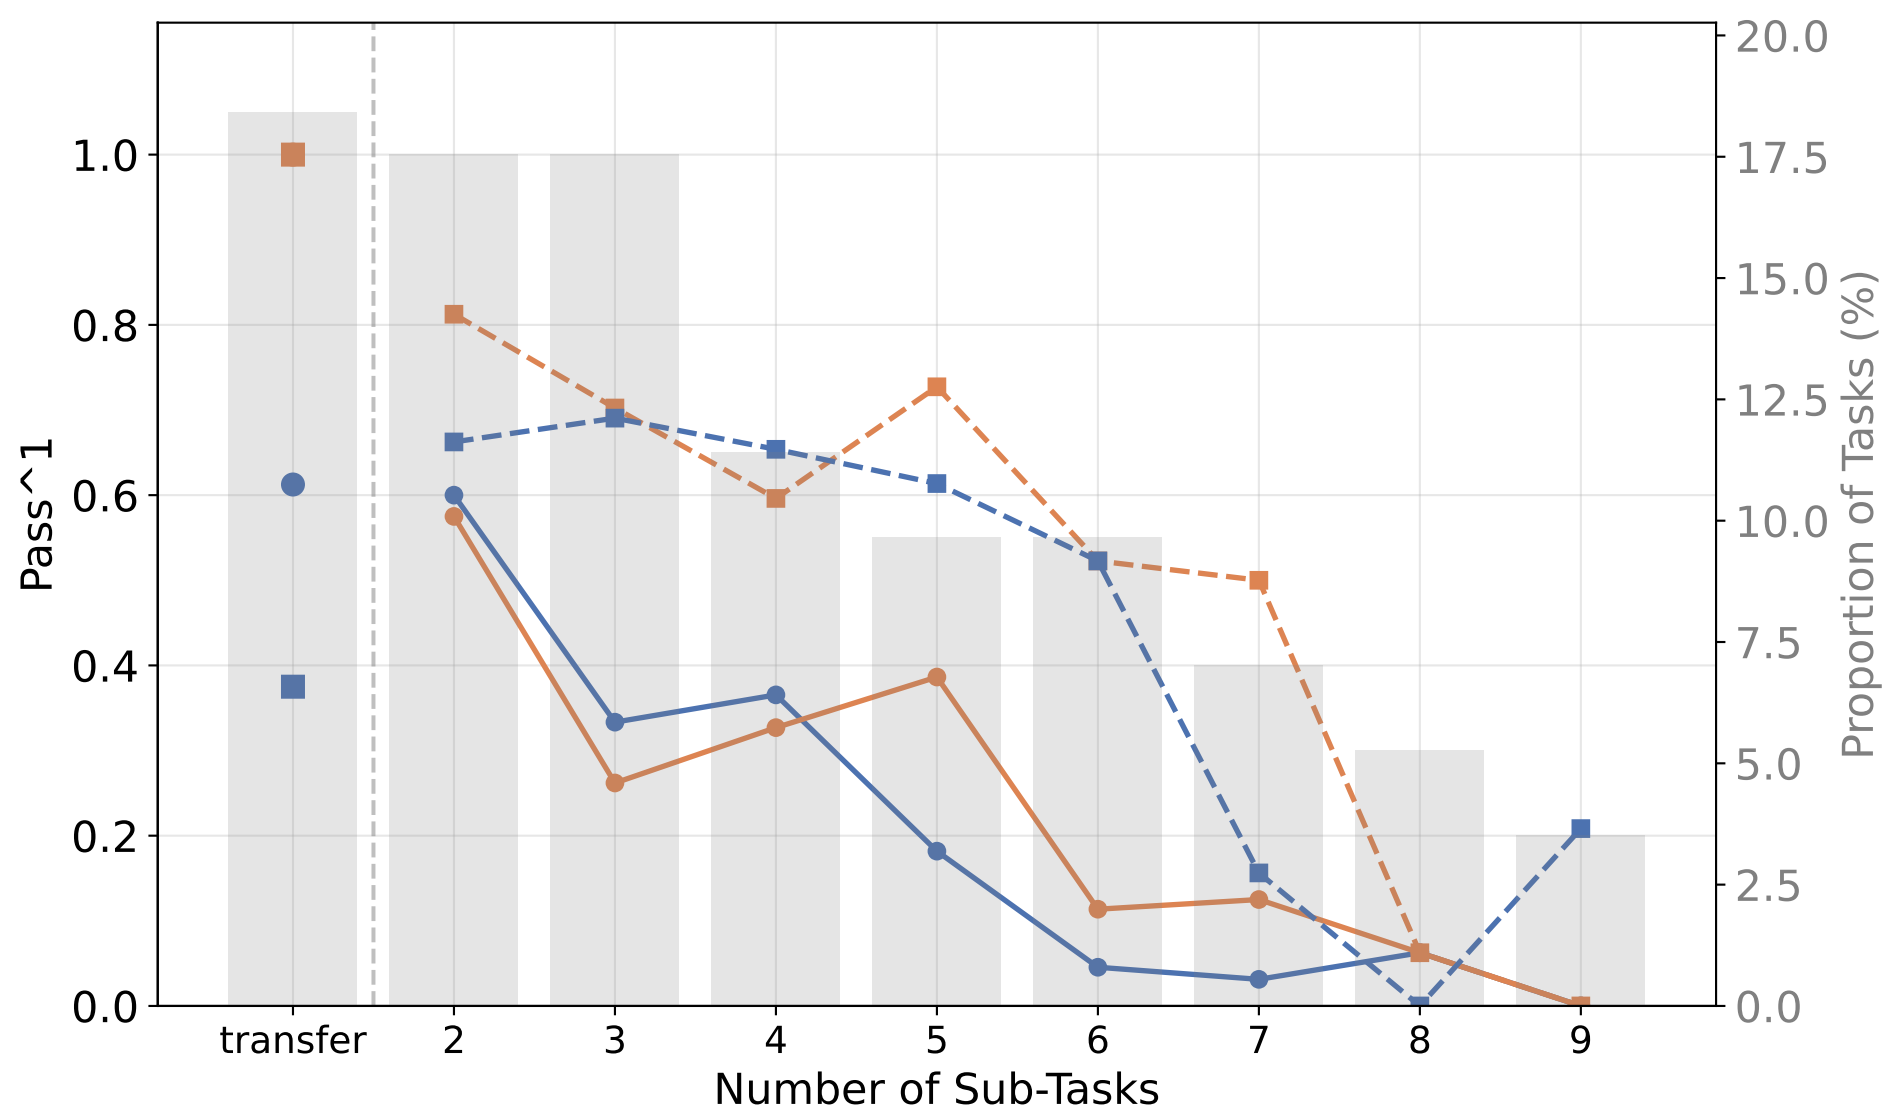

Supplement: supplementary_material [file pass_k_vs_num_issues_telecom_all_modes_llm_comparison.pdf › tau2-bench/data/tau2/results/final/figs/pass_k_vs_num_issues_telecom_all_modes_llm_comparison.pdf]

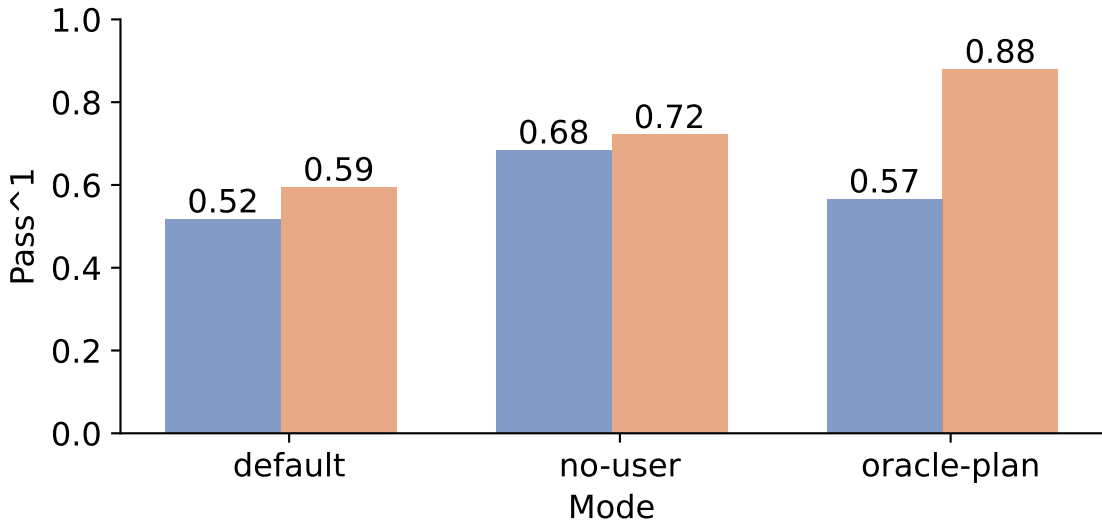

Supplement: supplementary_material [file pass_one_metrics_telecom-workflow_bar.pdf › tau2-bench/data/tau2/results/final/figs/pass_one_metrics_telecom-workflow_bar.pdf]

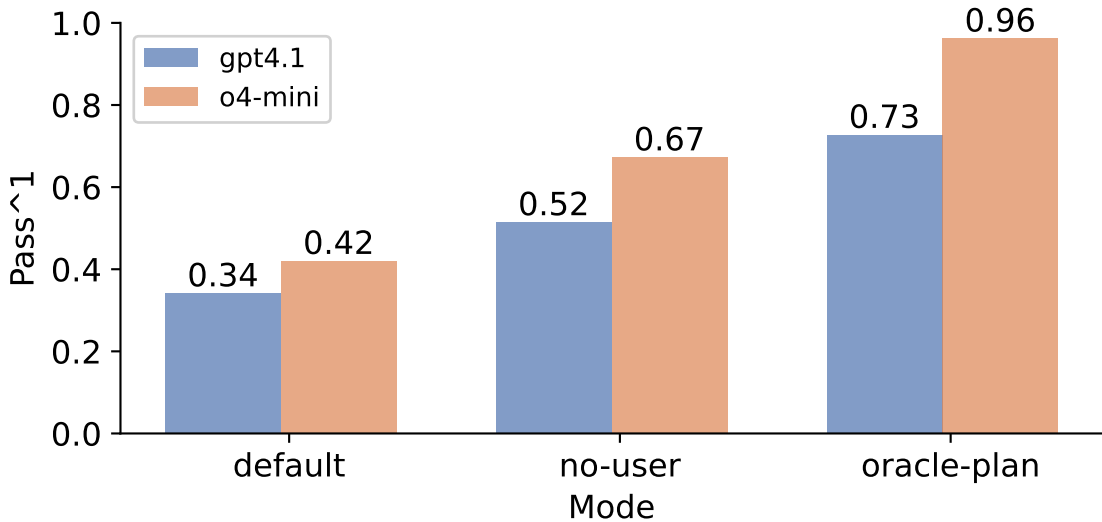

Supplement: supplementary_material [file pass_one_metrics_telecom_bar.pdf › tau2-bench/data/tau2/results/final/figs/pass_one_metrics_telecom_bar.pdf]
